# Supplementary material for: Photoluminescence properties of TADF-emitting three-coordinate silver(i) halide complexes with diphosphine ligands: a comparison study with copper(i) complexes
Source: Royal Society of Chemistry journal article supplement (doi:10.1039/c7dt02460f), 2017-01-01
Supplement: c7dt02460f1.pdf [file c7dt02460f1.pdf]

Electronic Supplementary Material (ESI) for Dalton Transactions.  
This journal is © The Royal Society of Chemistry 2017

## Electronic Supplementary Information for

### Photoluminescence properties of TADF-emitting three-coordinate silver(I) halide complexes with diphosphine ligands: a comparison study with copper(I) complexes

Masahisa Osawa, Masashi Hashimoto, Isao Kawata and Mikio Hoshino

#### Contents

|                                                                                                                                                                                              | page  |
|----------------------------------------------------------------------------------------------------------------------------------------------------------------------------------------------|-------|
| 1. Crystal Structure determination                                                                                                                                                           | S2    |
| <b>Table S1</b> Crystallographic data for <b>1–3</b>                                                                                                                                         |       |
| 2. NMR Experiments                                                                                                                                                                           | S36S5 |
| <b>Fig. S1</b> <sup>1</sup> H NMR spectrum of <b>1</b> in CD <sub>2</sub> Cl <sub>2</sub> at 220 K.                                                                                          |       |
| <b>Fig. S2</b> <sup>31</sup> P{ <sup>1</sup> H} NMR spectrum of <b>1</b> in CD <sub>2</sub> Cl <sub>2</sub> at 220 K.                                                                        |       |
| <b>Fig. S3</b> <sup>1</sup> H NMR spectrum of <b>2</b> in CD <sub>2</sub> Cl <sub>2</sub> at 220 K.                                                                                          |       |
| <b>Fig. S4</b> <sup>31</sup> P{ <sup>1</sup> H} NMR spectrum of <b>2</b> in CD <sub>2</sub> Cl <sub>2</sub> at 220 K.                                                                        |       |
| <b>Fig. S5</b> <sup>1</sup> H NMR spectrum of <b>3</b> in CD <sub>2</sub> Cl <sub>2</sub> at 220 K.                                                                                          |       |
| <b>Fig. S6</b> <sup>31</sup> P{ <sup>1</sup> H} NMR spectrum of <b>3</b> in CD <sub>2</sub> Cl <sub>2</sub> at 220 K.                                                                        |       |
| 3. Photophysical data                                                                                                                                                                        | S6    |
| <b>Table S2</b> <i>k<sub>r</sub></i> and <i>k<sub>nr</sub></i> values of <b>1–3</b> in the solid at 300 K and at 77 K                                                                        |       |
| 4. Theoretical Studies                                                                                                                                                                       | S6    |
| <b>Table S3</b> Composition of hole and electron in S <sub>1</sub> of (L <sub>Et</sub> )CuBr (S <sub>1</sub> -optimized geometry)                                                            |       |
| <b>Table S4</b> Composition of hole and electron in S <sub>1</sub> of <b>2</b> (S <sub>1</sub> -optimized geometry)                                                                          |       |
| <b>Figure S7</b> Absorption spectra and the calculated S <sub>n</sub> → S <sub>0</sub> transitions at the optimized ground state geometry of <b>1–3</b> in CH <sub>2</sub> Cl <sub>2</sub> . |       |
| <b>Table S5</b> Calculated energy levels, oscillator strengths ( <i>f</i> ), and orbital transitions for selected lower-lying transitions of <b>1–3</b>                                      |       |
| <b>Figure S8</b> Frontier orbitals of HOMO, LUMO, LUMO+1, LUMO+2, and LUMO+3 obtained with the calculation of <b>1–3</b> in the optimized S <sub>0</sub> structures.                         |       |
| <b>Table S6</b> Geometry data of <b>1</b> (S <sub>0</sub> in CH <sub>2</sub> Cl <sub>2</sub> , S <sub>0</sub> , S <sub>1</sub> , and T <sub>1</sub> )                                        |       |
| <b>Table S7</b> Geometry data of <b>2</b> (S <sub>0</sub> in CH <sub>2</sub> Cl <sub>2</sub> , S <sub>0</sub> , S <sub>1</sub> , and T <sub>1</sub> )                                        |       |
| <b>Table S8</b> Geometry data of <b>3</b> (S <sub>0</sub> in CH <sub>2</sub> Cl <sub>2</sub> , S <sub>0</sub> , S <sub>1</sub> , and T <sub>1</sub> )                                        |       |

1. Crystal Structure determination

**Table S1.** Crystallographic data of **1–3**.

|                                                                                                  | <b>1</b>                                                         | <b>2</b>                                           | <b>3</b>                                           |
|--------------------------------------------------------------------------------------------------|------------------------------------------------------------------|----------------------------------------------------|----------------------------------------------------|
| Formula                                                                                          | C <sub>68</sub> H <sub>6</sub> Ag <sub>2</sub> Br P <sub>4</sub> | C <sub>38</sub> H <sub>40</sub> AgBrP <sub>2</sub> | C <sub>42</sub> H <sub>48</sub> AgBrP <sub>2</sub> |
| formula weight                                                                                   | 1380.64                                                          | 764.42                                             | 802.52                                             |
| cryst syst                                                                                       | triclinic                                                        | triclinic                                          | orthorhombic                                       |
| space group                                                                                      | <i>P</i> $\bar{1}$                                               | <i>P</i> $\bar{1}$                                 | <i>Pna</i> 2 <sub>1</sub>                          |
| <i>a</i> / Å                                                                                     | 13.6283 (14)                                                     | 10.4800(10)                                        | 20.3555(14)                                        |
| <i>b</i> / Å                                                                                     | 14.8803 (15)                                                     | 11.6374(9)                                         | 9.5582(6)                                          |
| <i>c</i> / Å                                                                                     | 16.1037 (17)                                                     | 15.2140(16)                                        | 19.5813(12)                                        |
| $\alpha$ / deg                                                                                   | 102.969 (2)                                                      | 80.148(6)                                          | -                                                  |
| $\beta$ / deg                                                                                    | 95.674 (1)                                                       | 87.232(6)                                          | -                                                  |
| $\gamma$ / deg                                                                                   | 107.632 (2)                                                      | 64.089(4)                                          | -                                                  |
| <i>V</i> / Å <sup>3</sup>                                                                        | 2983.6 (5)                                                       | 1643.6(3)                                          | 3809.8(4)                                          |
| <i>Z</i>                                                                                         | 2                                                                | 2                                                  | 4                                                  |
| <i>d</i> <sub>calcd</sub> / g cm <sup>-3</sup>                                                   | 1.537                                                            | 1.508                                              | 1.399                                              |
| <i>T</i> / K                                                                                     | 90(2)                                                            | 90(2)                                              | 90(2)                                              |
| radiation                                                                                        | Mo K $\alpha$                                                    | Mo K $\alpha$                                      | Mo K $\alpha$                                      |
|                                                                                                  | ( $\lambda$ = 0.71073 Å)                                         | ( $\lambda$ = 0.71073 Å)                           | ( $\lambda$ = 0.71073 Å)                           |
| $\mu$ / cm <sup>-1</sup>                                                                         | 2.144                                                            | 1.952                                              | 1.690                                              |
| Diffractometer                                                                                   | Rigaku AFC-8                                                     | Rigaku AFC-8                                       | Rigaku AFC-8                                       |
| max 2 $\theta$ / deg                                                                             | 60                                                               | 60                                                 | 60                                                 |
| reflns collcd                                                                                    | 80385                                                            | 19809                                              | 18741                                              |
| indep reflns                                                                                     | 18806                                                            | 9502                                               | 9221                                               |
|                                                                                                  | ( <i>R</i> <sub>int</sub> = 0.0295)                              | ( <i>R</i> <sub>int</sub> = 0.0245)                | ( <i>R</i> <sub>int</sub> = 0.0262)                |
| no. of param refined                                                                             | 685                                                              | 379                                                | 415                                                |
| <i>R</i> <i>I</i> , <sup>[a]</sup> <i>wR</i> 2 ( <i>I</i> > 2 $\sigma$ <i>I</i> ) <sup>[b]</sup> | 0.0345, 0.0868                                                   | 0.0284, 0.0725                                     | 0.0222, 0.0395                                     |
| <i>S</i>                                                                                         | 0.880                                                            | 1.051                                              | 0.902                                              |

2.

[a]  $R I = \frac{\sum ||F_o| \delta |F_c|/ |F_o|}{\sum |F_o|}$ . [b]  $wR2 = [\frac{\sum w(|F_o| \delta |F_c|)^2}{\sum w|F_o|^2}]^{1/2}$

## 2. NMR Experiments

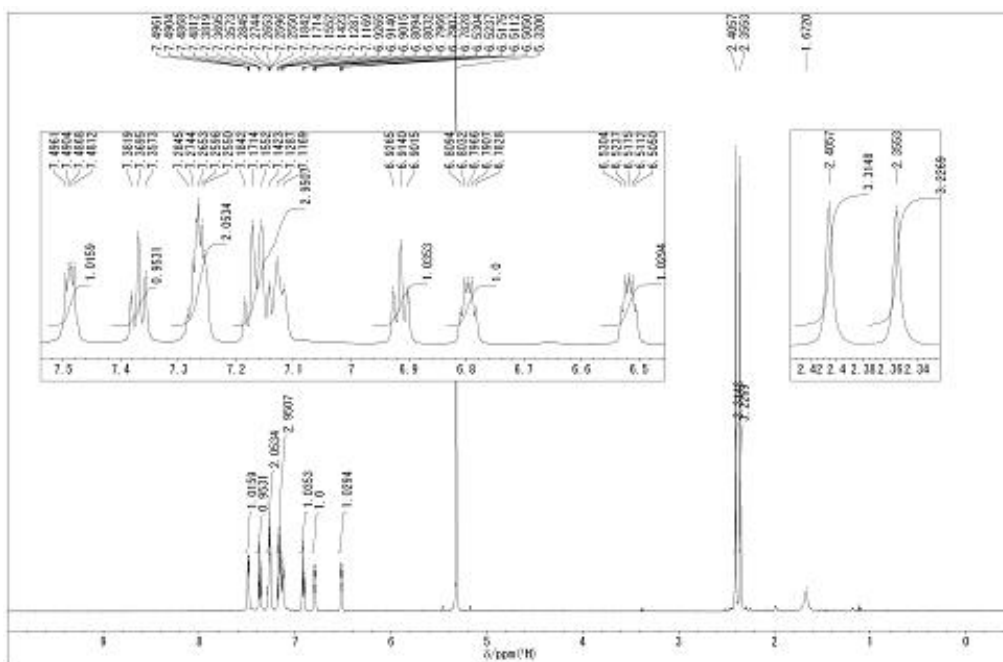



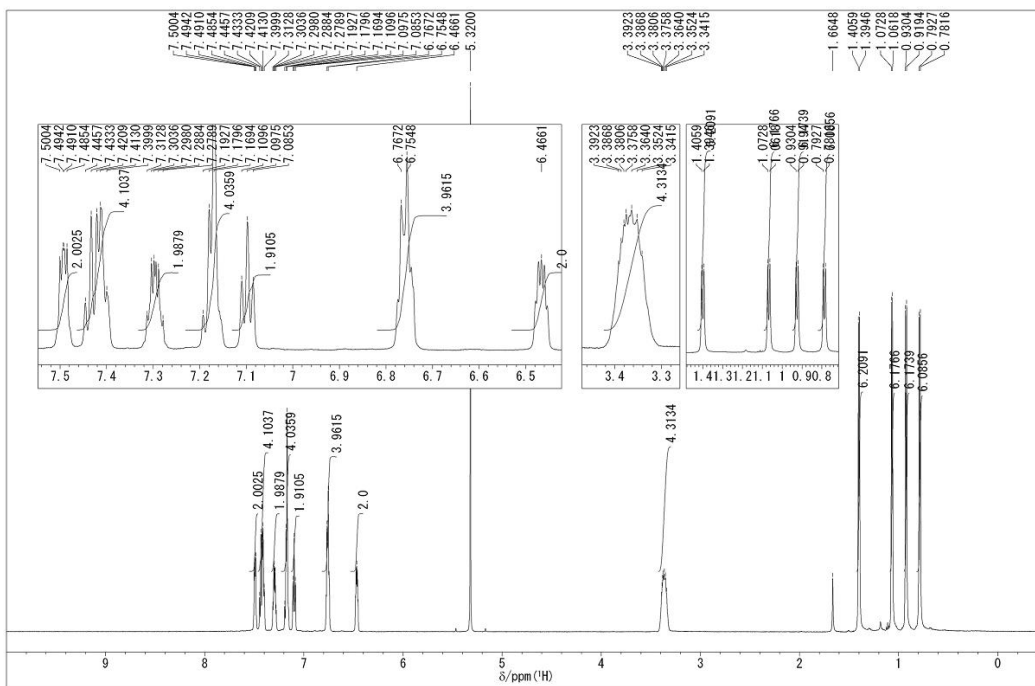

Fig. S5  $^1\text{H}$  NMR spectrum of **3** in  $\text{CD}_2\text{Cl}_2$  at 220 K.

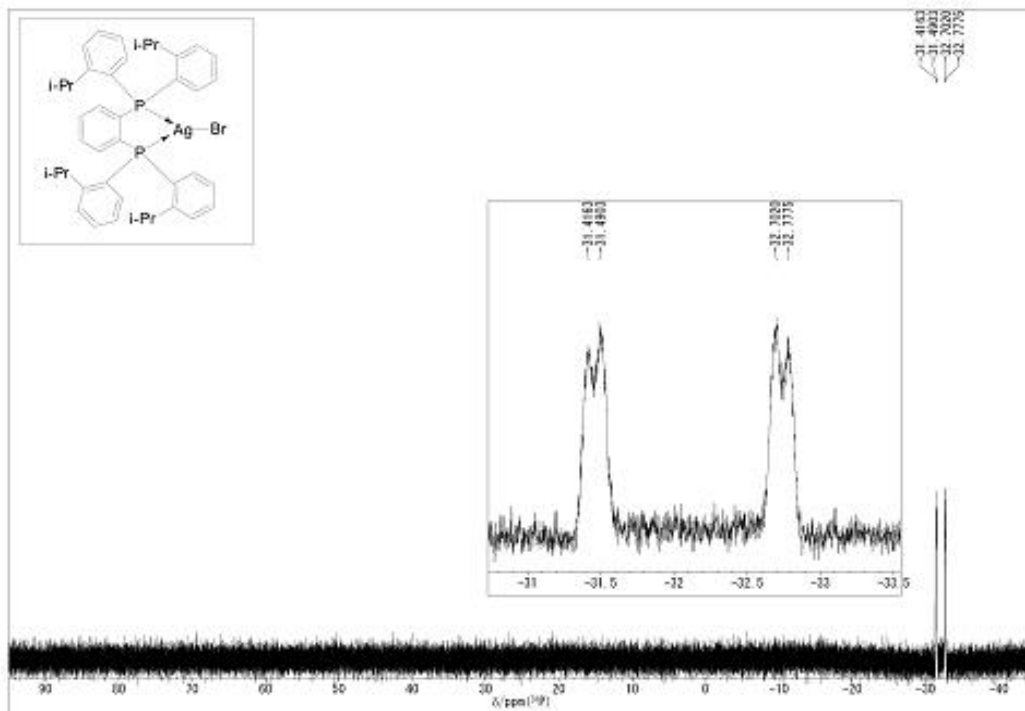

Fig. S6  $^{31}\text{P}\{^1\text{H}\}$  NMR spectrum of **3** in  $\text{CD}_2\text{Cl}_2$  at 220 K.

### 3. Photophysical data

**Table S2**  $k_r$  and  $k_{nr}$  values of **1–3** in the solid at 300 K and at 77 K.

|          | $K_r$ at 293 K <sup>a</sup> | $K_{nr}$ at 293 K <sup>b</sup> | $K_r$ at 77 K <sup>a</sup> | $K_{nr}$ at 77 K <sup>b</sup> |
|----------|-----------------------------|--------------------------------|----------------------------|-------------------------------|
| <b>1</b> | $1.0 \times 10^5$           | $7.9 \times 10^4$              | $7.8 \times 10^2$          | 87                            |
| <b>2</b> | $1.0 \times 10^5$           | $4.3 \times 10^4$              | $1.1 \times 10^3$          | 22                            |
| <b>3</b> | $1.3 \times 10^5$           | $2.6 \times 10^3$              | $7.5 \times 10^2$          | 15                            |

<sup>a</sup> Radiative rate constant.  $k_r = \Phi / \tau$ . The  $k_r$  values, tentatively estimated from the average lifetime  $(\tau_1 + \tau_2)/2$  and  $\Phi_{PL}$ . <sup>b</sup> Non-radiative constant.  $k_{nr} = (1 / \Phi - 1) \times k_r$ .

### 4. Theoretical Studies

**Table S3** Composition of hole and electron in  $S_1$  and  $T_1$  of (L<sub>El</sub>)CuBr **2** ( $S_1$ -optimized geometry).

|    | percentage composition (%) |                |
|----|----------------------------|----------------|
|    | hole ( $S_1$ )             | hole ( $T_1$ ) |
| Cu | 28                         | 28             |
| P  | 28                         | 29             |
| Br | 18                         | 19             |

**Table S4** Composition of hole and electron in  $S_1$  and  $T_1$  of **2** ( $S_1$ -optimized geometry).

|    | percentage composition (%) |                |
|----|----------------------------|----------------|
|    | hole ( $S_1$ )             | hole ( $T_1$ ) |
| Ag | 14                         | 14             |
| P  | 27                         | 27             |
| Br | 35                         | 36             |

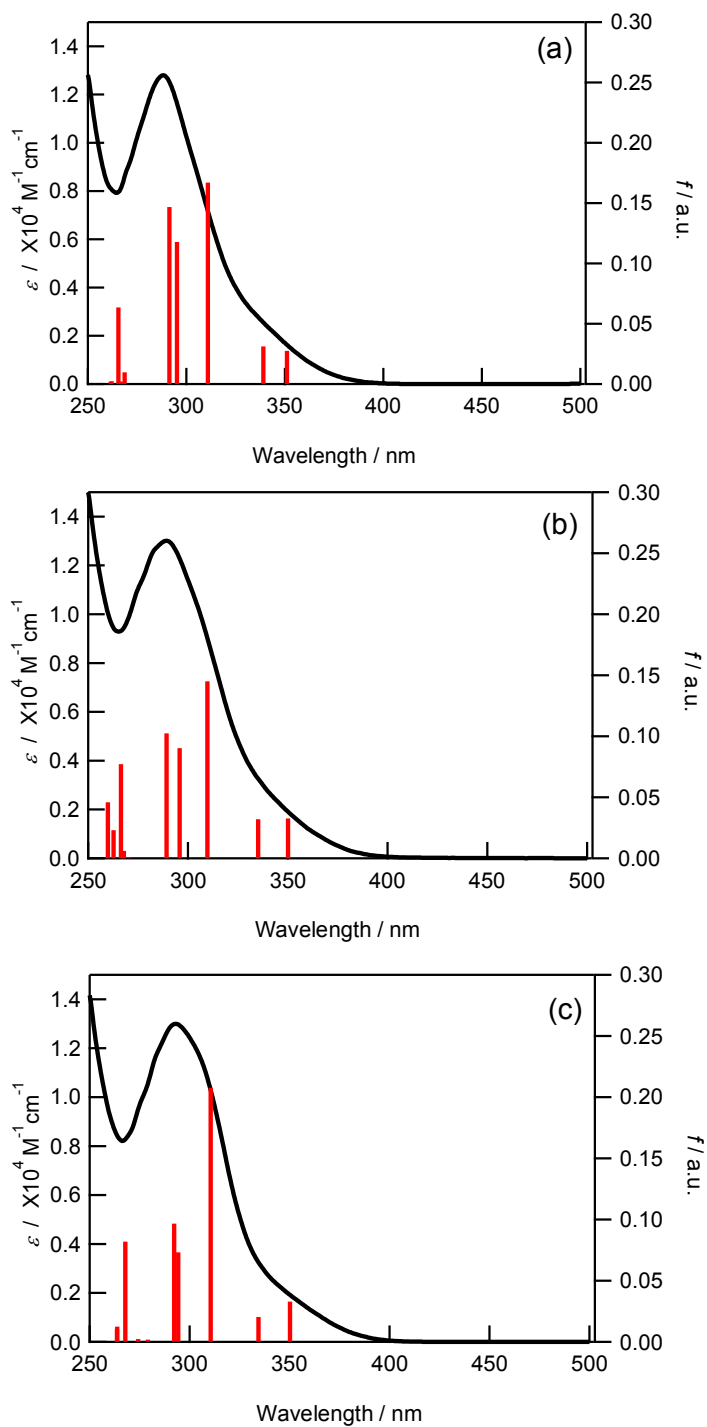

**Figure S7** Absorption spectra (black) and calculated singlet transitions (red) at the optimized ground state  $S_0$  geometry in  $\text{CH}_2\text{Cl}_2$ . The oscillator strengths of  $S_n \rightarrow S_0$  ( $n \in \{0, 10\}$ ) transitions calculated are presented with bars; (a) complex **1**, (b) complex **2** and (c) complex **3**.

**Table S5** Calculated energy levels, oscillator strengths ( $f$ ), and orbital transitions for selected lower-lying transitions of **1** **3**

|          | states | $\lambda_{\text{cal}} / \text{nm}$ (eV) | $f$    | assignments        |
|----------|--------|-----------------------------------------|--------|--------------------|
| <b>1</b> | S1     | 351 (3.532)                             | 0.0275 | HOMO LUMO (100%)   |
|          | S2     | 339 (3.656)                             | 0.0312 | HOMO LUMO+1 (100%) |
|          | S3     | 311 (3.987)                             | 0.1670 | HOMO LUMO+2 (100%) |
|          | S4     | 295 (4.200)                             | 0.1177 | HOMO LUMO+3 (100%) |
| <b>2</b> | S1     | 350 (3.541)                             | 0.0327 | HOMO LUMO (100%)   |
|          | S2     | 335 (3.699)                             | 0.0320 | HOMO LUMO+1 (100%) |
|          | S3     | 309 (4.003)                             | 0.1450 | HOMO LUMO+2 (100%) |
|          | S4     | 296 (4.191)                             | 0.0902 | HOMO LUMO+3 (100%) |
| <b>3</b> | S1     | 350 (3.542)                             | 0.0329 | HOMO LUMO (100%)   |
|          | S2     | 334 (3.707)                             | 0.0203 | HOMO LUMO+1 (100%) |
|          | S3     | 310 (3.993)                             | 0.2077 | HOMO LUMO+2 (100%) |
|          | S4     | 294 (4.213)                             | 0.0732 | HOMO LUMO+3 (100%) |

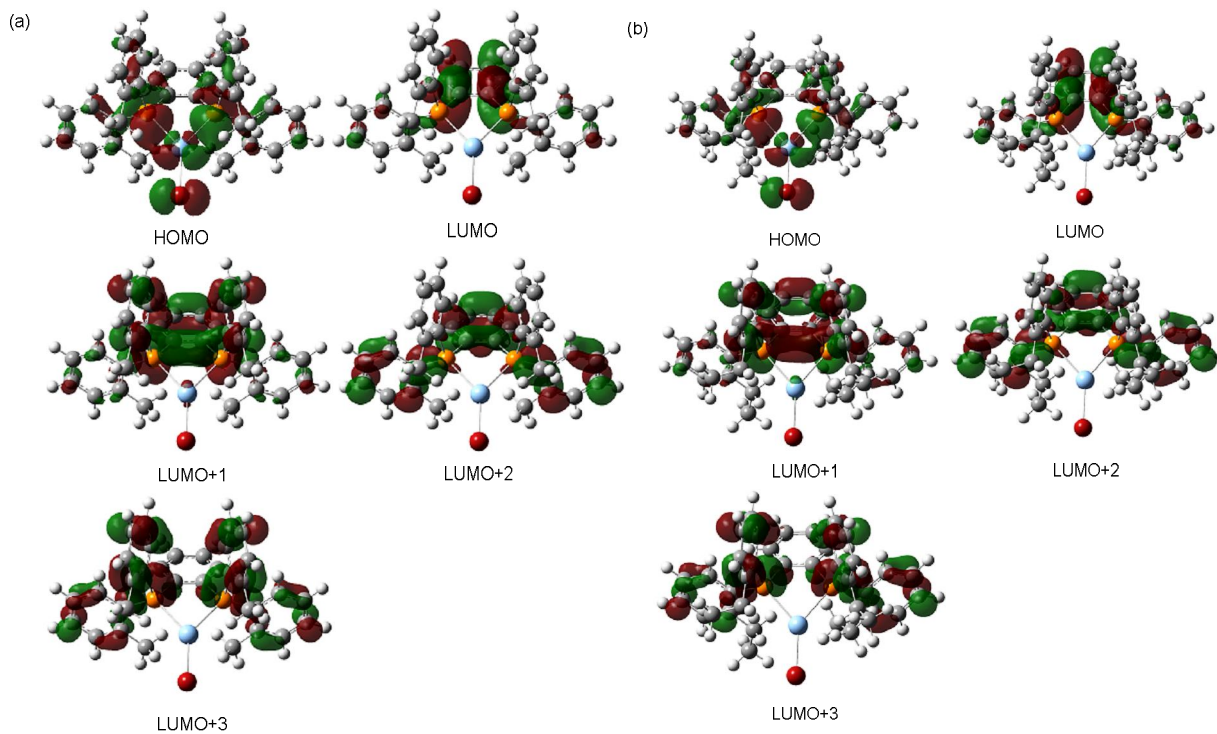



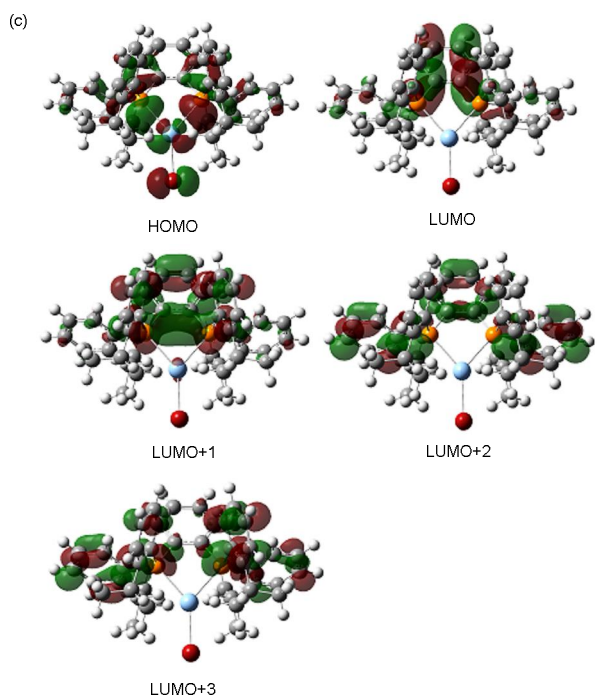

**Figure S8** Frontier orbitals of HOMO, LUMO, LUMO+1, LUMO+2, and LUMO+3 obtained with the calculation of **1-3** in the optimized  $S_0$  structures.

**Table S6** Geometry data of **1** ( $S_0$  in  $\text{CH}_2\text{Cl}_2$ ,  $S_0$ ,  $S_1$ , and  $T_1$ )

$S_0$  optimization in  $\text{CH}_2\text{Cl}_2$ : unit Å

|    |           |           |           |   |           |           |          |
|----|-----------|-----------|-----------|---|-----------|-----------|----------|
| Br | -0.171312 | -0.826560 | -0.626067 | C | 2.362177  | -4.045334 | 6.080098 |
| Ag | -0.070635 | -0.307177 | 1.965171  | C | 1.889776  | -2.940756 | 6.783206 |
| P  | 1.657723  | -0.031194 | 3.858040  | C | 1.695961  | -1.733206 | 6.114917 |
| P  | -1.698953 | 0.204814  | 3.898459  | C | 0.771038  | 1.037616  | 5.076977 |
| C  | 3.316976  | 0.749862  | 3.700324  | C | 1.515090  | 1.804642  | 5.986509 |
| C  | 3.473610  | 1.923789  | 2.924898  | C | 0.893840  | 2.656982  | 6.896106 |
| C  | 4.758429  | 2.461172  | 2.790734  | C | -0.495361 | 2.757726  | 6.910237 |
| C  | 5.869499  | 1.868163  | 3.388091  | C | -1.250822 | 2.004366  | 6.014997 |
| C  | 5.710523  | 0.711323  | 4.146032  | C | -0.643189 | 1.139071  | 5.092424 |
| C  | 4.439714  | 0.159980  | 4.299135  | C | -3.216028 | 1.234605  | 3.741545 |
| C  | 1.967338  | -1.611532 | 4.744832  | C | -3.192507 | 2.404473  | 2.944985 |
| C  | 2.450169  | -2.731307 | 4.024500  | C | -4.376610 | 3.137501  | 2.811122 |
| C  | 2.639252  | -3.931557 | 4.718831  | C | -5.560912 | 2.739767  | 3.429411 |
|    |           |           |           | C | -5.579683 | 1.585675  | 4.207808 |
|    |           |           |           | C | -4.411348 | 0.841293  | 4.360642 |
|    |           |           |           | C | -2.243397 | -1.294800 | 4.811650 |

|   |           |           |          |    |             |             |             |
|---|-----------|-----------|----------|----|-------------|-------------|-------------|
| C | -2.902196 | -2.334903 | 4.111703 | H  | 3.557987    | -1.921911   | 2.345953    |
| C | -3.276634 | -3.478124 | 4.826713 | H  | -1.144606   | 3.112870    | 2.965305    |
| C | -3.012758 | -3.613069 | 6.188644 | H  | -2.146013   | 3.792106    | 1.675213    |
| C | -2.364676 | -2.587539 | 6.871182 | H  | -1.554952   | 2.127510    | 1.559208    |
| C | -1.985381 | -1.436901 | 6.182325 | H  | -3.863546   | -1.382553   | 2.416964    |
| C | 2.314417  | 2.611840  | 2.254963 | H  | -3.754351   | -3.144723   | 2.310128    |
| C | 2.783931  | -2.669662 | 2.557280 | H  | -2.321335   | -2.144197   | 2.032135    |
| C | -1.945625 | 2.884486  | 2.252072 |    |             |             |             |
| C | -3.226978 | -2.246285 | 2.643886 |    |             |             |             |
| H | 4.886734  | 3.364606  | 2.198778 | Ag | -2.00290169 | -0.00058903 | 0.16391199  |
| H | 6.853997  | 2.310183  | 3.258958 | Br | -0.14272717 | -0.00635363 | -2.00107675 |
| H | 6.566239  | 0.237569  | 4.619639 | P  | -3.98636690 | 1.70621040  | 0.18121194  |
| H | 4.320000  | -0.741980 | 4.892404 | P  | -3.99006893 | -1.70327619 | 0.18002785  |
| H | 3.012483  | -4.795720 | 4.173979 | C  | -4.12583614 | 3.25757802  | 1.17386645  |
| H | 2.517184  | -4.994473 | 6.586467 | C  | -3.72345476 | 3.26761583  | 2.53069806  |
| H | 1.672529  | -3.012273 | 7.845497 | C  | -3.80159727 | 4.47326343  | 3.23735829  |
| H | 1.330816  | -0.874158 | 6.669159 | H  | -3.49279184 | 4.48634976  | 4.28035261  |
| H | 2.599231  | 1.736113  | 5.977526 | C  | -4.25925177 | 5.64720280  | 2.64195737  |
| H | 1.495736  | 3.239927  | 7.587867 | H  | -4.30264809 | 6.56704934  | 3.21948670  |
| H | -0.992905 | 3.420502  | 7.612954 | C  | -4.65989917 | 5.63169055  | 1.30882432  |
| H | -2.333621 | 2.091945  | 6.028043 | H  | -5.02470990 | 6.53625979  | 0.82931760  |
| H | -4.366241 | 4.038948  | 2.202572 | C  | -4.59290115 | 4.44220011  | 0.58554955  |
| H | -6.463913 | 3.330660  | 3.300089 | H  | -4.90797374 | 4.43629814  | -0.45399038 |
| H | -6.494649 | 1.262789  | 4.697273 | C  | -4.45425833 | 2.22657069  | -1.52264348 |
| H | -4.429947 | -0.058037 | 4.969501 | C  | -3.52545490 | 2.95318965  | -2.30810320 |
| H | -3.786774 | -4.279942 | 4.297737 | C  | -3.88871447 | 3.29147054  | -3.61674350 |
| H | -3.314732 | -4.516798 | 6.711513 | H  | -3.18190957 | 3.85258925  | -4.22397858 |
| H | -2.154551 | -2.676145 | 7.933639 | C  | -5.12111007 | 2.92812029  | -4.15697554 |
| H | -1.484174 | -0.638634 | 6.720844 | H  | -5.36699763 | 3.20338949  | -5.17937050 |
| H | 2.652914  | 3.494921  | 1.705143 | C  | -6.03032232 | 2.21621113  | -3.38023977 |
| H | 1.560268  | 2.940378  | 2.980002 | H  | -6.99742200 | 1.92843247  | -3.78392719 |
| H | 1.809841  | 1.947851  | 1.541172 | C  | -5.69462857 | 1.87266579  | -2.07156101 |
| H | 1.909073  | -2.402183 | 1.950534 | H  | -6.41144667 | 1.32323584  | -1.46978913 |
| H | 3.151175  | -3.637504 | 2.203560 | C  | -5.43080466 | 0.71083313  | 0.77665817  |

|   |             |             |             |    |             |             |             |
|---|-------------|-------------|-------------|----|-------------|-------------|-------------|
| C | -6.55486217 | 1.38724639  | 1.27809421  | H  | -1.57692930 | 2.52908484  | -1.47113451 |
| H | -6.56043203 | 2.47349614  | 1.28704068  | H  | -2.28421805 | 4.05190156  | -0.91317359 |
| C | -7.66058206 | 0.69981610  | 1.77060859  | H  | -1.62556849 | 3.92891245  | -2.55073334 |
| H | -8.51464180 | 1.25255688  | 2.15268763  | C  | -3.25625459 | -1.99745866 | 3.23846653  |
| C | -7.66130968 | -0.69315406 | 1.77057628  | H  | -2.95155408 | -2.21900374 | 4.26577086  |
| H | -8.51606661 | -1.24507221 | 2.15228643  | H  | -4.04668951 | -1.23830422 | 3.28292114  |
| C | -6.55594127 | -1.38129023 | 1.27848539  | H  | -2.39981061 | -1.54251161 | 2.72523691  |
| H | -6.56180318 | -2.46747185 | 1.28572184  | C  | -2.20261715 | -3.39211259 | -1.79416059 |
| C | -5.43110512 | -0.70590166 | 0.77756310  | H  | -1.65680227 | -3.94584300 | -2.56407551 |
| C | -4.12414707 | -3.24889154 | 1.18276662  | H  | -2.29359625 | -4.04316546 | -0.91643989 |
| C | -3.72876261 | -3.24383405 | 2.54170052  | H  | -1.58624916 | -2.53170427 | -1.50452273 |
| C | -3.80513069 | -4.44282262 | 3.25971217  | Ag | 2.00285155  | 0.00100863  | -0.16398494 |
| H | -3.50316527 | -4.44390405 | 4.30479526  | Br | 0.14260473  | 0.00612638  | 2.00112159  |
| C | -4.25293131 | -5.62503901 | 2.67313285  | P  | 3.98626253  | -1.70619934 | -0.18148950 |
| H | -4.29525975 | -6.53932309 | 3.25950152  | P  | 3.99014419  | 1.70327625  | -0.17977549 |
| C | -4.64464813 | -5.62479871 | 1.33733599  | C  | 4.12579696  | -3.25750246 | -1.17425557 |
| H | -5.00078748 | -6.53610215 | 0.86408509  | C  | 3.72361290  | -3.26742430 | -2.53114668 |
| C | -4.57982646 | -4.44204853 | 0.60270952  | C  | 3.80184354  | -4.47301219 | -3.23790052 |
| H | -4.88786473 | -4.44953627 | -0.43901248 | C  | 4.25939998  | -5.64700796 | -2.64253742 |
| C | -4.47075643 | -2.22965232 | -1.51854951 | C  | 4.65986448  | -5.63161144 | -1.30934742 |
| C | -3.54861853 | -2.95793590 | -2.31042793 | C  | 4.59278255  | -4.44218061 | -0.58598492 |
| C | -3.92270642 | -3.29932317 | -3.61537153 | C  | 4.45407027  | -2.22672865 | 1.52234062  |
| H | -3.22035297 | -3.86170053 | -4.22668925 | C  | 3.52522231  | -2.95341514 | 2.30767985  |
| C | -5.15974324 | -2.93805516 | -4.14630908 | C  | 3.88842542  | -3.29186114 | 3.61629364  |
| H | -5.41385802 | -3.21557108 | -5.16607994 | C  | 5.12080308  | -2.92859105 | 4.15661887  |
| C | -6.06262859 | -2.22513775 | -3.36325098 | C  | 6.03004910  | -2.21658300 | 3.38001130  |
| H | -7.03345214 | -1.93902458 | -3.75916346 | C  | 5.69441446  | -1.87288156 | 2.07135878  |
| C | -5.71611772 | -1.87855251 | -2.05831029 | C  | 5.43076148  | -0.71081300 | -0.77677386 |
| H | -6.43051086 | -1.32925822 | -1.45362998 | C  | 6.55479745  | -1.38719231 | -1.27829788 |
| C | -3.24412527 | 2.02975212  | 3.23800097  | C  | 7.66053120  | -0.69973374 | -1.77074611 |
| H | -4.03906855 | 1.27727442  | 3.30953199  | C  | 7.66129623  | 0.69323510  | -1.77055287 |
| H | -2.91898682 | 2.26538761  | 4.25589471  | C  | 6.55595466  | 1.38134336  | -1.27835936 |
| H | -2.40051435 | 1.56057037  | 2.71639608  | C  | 5.43110893  | 0.70592520  | -0.77750358 |
| C | -2.18456027 | 3.38864957  | -1.78074212 | C  | 4.12422230  | 3.24900866  | -1.18232825 |

|   |            |             |             |    |                                     |             |             |
|---|------------|-------------|-------------|----|-------------------------------------|-------------|-------------|
| C | 3.72879911 | 3.24412798  | -2.54125356 | H  | 2.40083295                          | -1.56026983 | -2.71687826 |
| C | 3.80520417 | 4.44320130  | -3.25912074 | H  | 4.30286856                          | -6.56680549 | -3.22013998 |
| C | 4.25306473 | 5.62532857  | -2.67240710 | H  | 1.57684838                          | -2.52921654 | 1.47039085  |
| C | 4.64481076 | 5.62491259  | -1.33661954 | H  | 2.28406514                          | -4.05218213 | 0.91274164  |
| C | 4.57996251 | 4.44207515  | -0.60213618 | H  | 1.62519284                          | -3.92889738 | 2.55019041  |
| C | 4.47091240 | 2.22941413  | 1.51885954  | H  | 3.49319355                          | -4.48600328 | -4.28094204 |
| C | 3.54885842 | 2.95766602  | 2.31085774  | H  | 2.95162750                          | 2.21954560  | -4.26548250 |
| C | 3.92300451 | 3.29883898  | 3.61584094  | H  | 4.04656731                          | 1.23862686  | -3.28263224 |
| C | 5.16002156 | 2.93739044  | 4.14670193  | H  | 2.39967924                          | 1.54295967  | -2.72506506 |
| C | 6.06283296 | 2.22451583  | 3.36351920  | H  | 3.50321922                          | 4.44442501  | -4.30419798 |
| C | 5.71626181 | 1.87814351  | 2.05853748  | H  | 1.65748074                          | 3.94644145  | 2.56441868  |
| C | 3.24445267 | -2.02948565 | -3.23843198 | H  | 2.29370153                          | 4.04230061  | 0.91648172  |
| C | 2.18434939 | -3.38879726 | 1.78020368  | H  | 1.58607828                          | 2.53151831  | 1.50596631  |
| C | 3.25621679 | 1.99786808  | -3.23817406 |    |                                     |             |             |
| C | 2.20283636 | 3.39194777  | 1.79472513  |    |                                     |             |             |
|   |            |             |             |    | S <sub>1</sub> optimization: unit Å |             |             |
| H | 5.02460259 | -6.53622360 | -0.82986647 | Ag | 2.15851604                          | 0.06873962  | -0.15611278 |
| H | 4.29541806 | 6.53968140  | -3.25866676 | Br | 0.27150938                          | 0.68124343  | 1.79779386  |
| H | 4.90770654 | -4.43637113 | 0.45360108  | P  | 4.23620558                          | 1.50743317  | 0.25627661  |
| H | 5.00099479 | 6.53614539  | -0.86326675 | P  | 3.90563090                          | -1.69109656 | -0.67213201 |
| H | 3.18158544 | -3.85303829 | 4.22343444  | C  | 4.27624235                          | 3.20189252  | -0.44856644 |
| H | 4.88802884 | 4.44942117  | 0.43957912  | C  | 3.58997236                          | 3.56006817  | -1.63231660 |
| H | 5.36664361 | -3.20398635 | 5.17899120  | C  | 3.77411438                          | 4.84875598  | -2.14319632 |
| H | 6.99712968 | -1.92885068 | 3.78377747  | H  | 3.24444877                          | 5.12824980  | -3.05133012 |
| H | 6.41125458 | -1.32336694 | 1.46968848  | C  | 4.61074302                          | 5.77709550  | -1.52328896 |
| H | 3.22071540 | 3.86119723  | 4.22725006  | H  | 4.73073140                          | 6.76959532  | -1.94959042 |
| H | 6.56033826 | -2.47344072 | -1.28736989 | C  | 5.28658676                          | 5.42131323  | -0.35885249 |
| H | 5.41418145 | 3.21474515  | 5.16650527  | H  | 5.94258176                          | 6.13005572  | 0.14001659  |
| H | 8.51457074 | -1.25245458 | -2.15289988 | C  | 5.11500430                          | 4.14583160  | 0.17334150  |
| H | 7.03364825 | 1.93827580  | 3.75935940  | H  | 5.63472480                          | 3.88039866  | 1.09015253  |
| H | 8.51605958 | 1.24517594  | -2.15221548 | C  | 4.56861516                          | 1.73347757  | 2.05808453  |
| H | 6.43059527 | 1.32887471  | 1.45376405  | C  | 3.78756050                          | 2.56742338  | 2.89523305  |
| H | 6.56185213 | 2.46752550  | -1.28545893 | C  | 4.06912578                          | 2.56836995  | 4.26685751  |
| H | 4.03946905 | -1.27707072 | -3.30985604 | H  | 3.47324420                          | 3.20363810  | 4.91894109  |
| H | 2.91938724 | -2.26504160 | -4.25636721 | C  | 5.08166169                          | 1.78315255  | 4.81505244  |

|   |            |             |             |    |             |             |             |
|---|------------|-------------|-------------|----|-------------|-------------|-------------|
| H | 5.26745703 | 1.80956817  | 5.88578544  | H  | 6.17057778  | -2.30235086 | 0.98659331  |
| C | 5.84359874 | 0.96220577  | 3.98673745  | C  | 2.67675073  | 2.61056858  | -2.35458321 |
| H | 6.63512508 | 0.34159187  | 4.39828666  | H  | 3.18280461  | 1.66713678  | -2.58621067 |
| C | 5.57757467 | 0.93556942  | 2.62039893  | H  | 2.32948021  | 3.04194519  | -3.29844166 |
| H | 6.16150589 | 0.29171298  | 1.96904685  | H  | 1.78662519  | 2.36919054  | -1.75866073 |
| C | 5.56955842 | 0.58666278  | -0.47932838 | C  | 2.69961183  | 3.47372474  | 2.3826747   |
| C | 6.85664884 | 1.18261069  | -0.61226332 | H  | 2.10630312  | 3.00481062  | 1.59209118  |
| H | 6.99258870 | 2.21258337  | -0.28899850 | H  | 3.11872552  | 4.40167890  | 1.97469285  |
| C | 7.92548692 | 0.51481149  | -1.16537092 | H  | 2.01527263  | 3.74304472  | 3.19291763  |
| H | 8.88208640 | 1.02007871  | -1.26950251 | C  | 3.42653570  | -0.92220209 | -3.72505379 |
| C | 7.76933005 | -0.83267346 | -1.62485383 | H  | 2.56051974  | -0.45054189 | -3.24442008 |
| H | 8.59987755 | -1.35828863 | -2.08682171 | H  | 3.33205374  | -0.77384175 | -4.80500138 |
| C | 6.53937294 | -1.44912804 | -1.49829703 | H  | 4.32550675  | -0.39773640 | -3.38034278 |
| H | 6.42064795 | -2.47219783 | -1.85186323 | C  | 1.56594596  | -3.30732592 | 0.87255404  |
| C | 5.41698218 | -0.78993105 | -0.94614042 | H  | 1.11884013  | -2.32100048 | 1.05445853  |
| C | 3.66934919 | -2.85372255 | -2.06497502 | H  | 0.91771449  | -4.05097629 | 1.3463372   |
| C | 3.48428022 | -2.38446393 | -3.38904737 | H  | 1.53787875  | -3.47584300 | -0.20867735 |
| C | 3.35246198 | -3.32945181 | -4.41104635 | Ag | -1.95237268 | 0.07834829  | 0.1226212   |
| H | 3.21233112 | -2.97602227 | -5.43000020 | Br | 0.02300499  | -0.69560148 | -1.79047283 |
| C | 3.39150353 | -4.69998046 | -4.15847613 | P  | -3.95987870 | -1.47031484 | 0.76656579  |
| H | 3.28315506 | -5.40515337 | -4.97839449 | P  | -3.89850980 | 1.73777930  | -0.37346702 |
| C | 3.57416143 | -5.15623072 | -2.85576725 | C  | -4.07139245 | -2.60430900 | 2.21844114  |
| H | 3.61557718 | -6.22081041 | -2.64176104 | C  | -3.59718875 | -2.18114953 | 3.48295033  |
| C | 3.71159588 | -4.23665166 | -1.81914953 | C  | -3.65600920 | -3.08524374 | 4.54980018  |
| H | 3.86606983 | -4.59883298 | -0.80752941 | C  | -4.16261843 | -4.37426313 | 4.39495761  |
| C | 4.06720757 | -2.73632217 | 0.84004319  | C  | -4.63344332 | -4.78424574 | 3.15061398  |
| C | 2.95948194 | -3.38516919 | 1.43640289  | C  | -4.58696577 | -3.90071581 | 2.07368657  |
| C | 3.17928863 | -4.11553123 | 2.60977853  | C  | -4.53014291 | -2.49503235 | -0.65374886 |
| H | 2.33656699 | -4.62475626 | 3.07217881  | C  | -3.66070130 | -3.46566412 | -1.20976513 |
| C | 4.44051511 | -4.20307740 | 3.19744322  | C  | -4.10225889 | -4.18879179 | -2.32394489 |
| H | 4.57250401 | -4.77718929 | 4.11089476  | C  | -5.35672413 | -3.97400877 | -2.89196104 |
| C | 5.52323922 | -3.55109267 | 2.61248926  | C  | -6.20852805 | -3.02208563 | -2.33947981 |
| H | 6.51206258 | -3.60966590 | 3.05939615  | C  | -5.79356958 | -2.29203928 | -1.22689321 |
| C | 5.33073666 | -2.81671348 | 1.44458870  | C  | -5.34890141 | -0.28231892 | 1.06339445  |

|   |             |             |             |                                     |             |             |             |
|---|-------------|-------------|-------------|-------------------------------------|-------------|-------------|-------------|
| C | -6.45484328 | -0.71125781 | 1.81495988  | H                                   | -7.15156360 | 0.80969330  | -4.03125529 |
| C | -7.51836620 | 0.14093174  | 2.09875907  | H                                   | -8.31554506 | 2.13082522  | 1.84441742  |
| C | -7.49401595 | 1.45258155  | 1.63020654  | H                                   | -6.44266136 | 0.98599247  | -1.68054953 |
| C | -6.40611484 | 1.89619602  | 0.88356127  | H                                   | -6.39149293 | 2.92207771  | 0.52650338  |
| C | -5.32427958 | 1.05140137  | 0.58697543  | H                                   | -3.84101880 | -0.03566665 | 3.57990948  |
| C | -3.93793820 | 3.53230880  | 0.05609752  | H                                   | -2.68380925 | -0.69567843 | 4.74280275  |
| C | -3.50303067 | 3.96365552  | 1.33214587  | H                                   | -2.24336472 | -0.54842751 | 3.03453403  |
| C | -3.49929194 | 5.33689057  | 1.60241119  | H                                   | -4.18934562 | -5.05193082 | 5.24436421  |
| C | -3.90769110 | 6.27455238  | 0.65576317  | H                                   | -1.67185967 | -2.86601659 | -0.59844580 |
| C | -4.34054251 | 5.84535264  | -0.59578854 | H                                   | -2.37548377 | -4.15053951 | 0.39136420  |
| C | -4.35472821 | 4.48256238  | -0.88774706 | H                                   | -1.78273027 | -4.51128030 | -1.23642905 |
| C | -4.44996096 | 1.67852177  | -2.12951997 | H                                   | -3.29270999 | -2.76540614 | 5.52394128  |
| C | -3.54163947 | 2.02890399  | -3.15869278 | H                                   | -2.67478382 | 3.53823963  | 3.27143635  |
| C | -3.97441791 | 1.92706734  | -4.4858809  | H                                   | -3.92674378 | 2.39896193  | 2.75945288  |
| C | -5.25680969 | 1.48882131  | -4.81111505 | H                                   | -2.31011356 | 2.30395224  | 2.05618516  |
| C | -6.14620996 | 1.14871531  | -3.79609246 | H                                   | -3.16574783 | 5.67379846  | 2.58148770  |
| C | -5.74075033 | 1.24671779  | -2.46612513 | H                                   | -1.55832207 | 1.77386684  | -2.33191130 |
| C | -3.06265520 | -0.79546934 | 3.72122555  | H                                   | -1.62206203 | 2.74363341  | -3.80972320 |
| C | -2.30315648 | -3.76248373 | -0.63196223 | H                                   | -2.15368542 | 3.43722645  | -2.27160279 |
| C | -3.08003184 | 3.00170668  | 2.40829753  |                                     |             |             |             |
| C | -2.14793109 | 2.52221512  | -2.87614972 | T <sub>1</sub> optimization: unit Å |             |             |             |
| H | -5.03714503 | -5.78386378 | 3.01288401  | Ag                                  | 2.15782399  | 0.10469055  | -0.22141764 |
| H | -3.88779112 | 7.33393655  | 0.8981701   | Br                                  | 0.27584091  | 0.47073757  | 1.87193354  |
| H | -4.95780569 | -4.22545674 | 1.10566176  | P                                   | 4.26019443  | 1.51151487  | 0.07685864  |
| H | -4.66781507 | 6.56190505  | -1.34453663 | P                                   | 3.90169872  | -1.77439724 | -0.41746985 |
| H | -3.44037792 | -4.93735391 | -2.75368338 | C                                   | 4.37449894  | 3.09019385  | -0.84955319 |
| H | -4.69610854 | 4.15424132  | -1.86527154 | C                                   | 3.94460812  | 3.20137359  | -2.19489569 |
| H | -5.66430195 | -4.55056732 | -3.76051655 | C                                   | 4.16357036  | 4.40836409  | -2.86495286 |
| H | -7.19195628 | -2.84457557 | -2.76646755 | H                                   | 3.83084991  | 4.49743886  | -3.89679870 |
| H | -6.46658197 | -1.55615963 | -0.7988831  | C                                   | 4.79669368  | 5.48999917  | -2.25149746 |
| H | -3.28312983 | 2.19820109  | -5.28068273 | H                                   | 4.95215855  | 6.41286053  | -2.80405368 |
| H | -6.47972038 | -1.73119312 | 2.18780412  | C                                   | 5.23287690  | 5.37282964  | -0.93394787 |
| H | -5.55692538 | 1.41707437  | -5.85331676 | H                                   | 5.73730904  | 6.20040883  | -0.44181657 |
| H | -8.35931648 | -0.22053572 | 2.68440810  | C                                   | 5.01901236  | 4.18407552  | -0.24121491 |

|   |            |             |             |    |             |             |             |
|---|------------|-------------|-------------|----|-------------|-------------|-------------|
| H | 5.36004794 | 4.10183367  | 0.78690198  | H  | 1.96429175  | -4.03114634 | 3.61733755  |
| C | 4.46164324 | 1.98533415  | 1.84618688  | C  | 3.99982567  | -3.40944365 | 3.91832308  |
| C | 3.57214692 | 2.86285318  | 2.51435517  | H  | 4.02853102  | -3.76368460 | 4.94550272  |
| C | 3.77174539 | 3.08143874  | 3.88255011  | C  | 5.11888220  | -2.80351352 | 3.35150548  |
| H | 3.09186151 | 3.74978586  | 4.40659567  | H  | 6.03373657  | -2.68380299 | 3.92549599  |
| C | 4.80818038 | 2.47007576  | 4.58576613  | C  | 5.05560231  | -2.34506755 | 2.03859418  |
| H | 4.92874667 | 2.66375227  | 5.64858745  | H  | 5.92190152  | -1.87048511 | 1.58618359  |
| C | 5.67906864 | 1.60833519  | 3.92263355  | C  | 3.28736697  | 2.06531992  | -2.92452450 |
| H | 6.49238486 | 1.12419261  | 4.45662684  | H  | 3.90695201  | 1.16257422  | -2.88435137 |
| C | 5.49484188 | 1.36367142  | 2.56469606  | H  | 3.12703480  | 2.31747465  | -3.97737597 |
| H | 6.16378558 | 0.68727945  | 2.04083849  | H  | 2.31062627  | 1.80629059  | -2.49530371 |
| C | 5.60866118 | 0.46580585  | -0.42594322 | C  | 2.45377446  | 3.59478297  | 1.82118386  |
| C | 6.90193328 | 1.02802831  | -0.62625745 | H  | 1.91858398  | 2.95548088  | 1.11184342  |
| H | 7.05562366 | 2.08076861  | -0.39596033 | H  | 2.83109886  | 4.46147261  | 1.26470526  |
| C | 7.95341001 | 0.29316287  | -1.12580183 | H  | 1.72404754  | 3.95709207  | 2.55150057  |
| H | 8.92146502 | 0.76544647  | -1.27216342 | C  | 3.41386864  | -1.59240326 | -3.56113560 |
| C | 7.76390947 | -1.08335333 | -1.47492278 | H  | 2.65468210  | -0.98321056 | -3.05709296 |
| H | 8.58190759 | -1.66157945 | -1.89562780 | H  | 3.14877181  | -1.65059982 | -4.62103058 |
| C | 6.52862345 | -1.66696450 | -1.28801548 | H  | 4.37160902  | -1.06476578 | -3.47735921 |
| H | 6.38802317 | -2.71287456 | -1.55467808 | C  | 1.46826546  | -3.33867840 | 1.07958504  |
| C | 5.42753551 | -0.94626865 | -0.75714920 | H  | 0.64053258  | -3.54084896 | 1.76529568  |
| C | 3.72195765 | -3.17329899 | -1.57371887 | H  | 1.55828630  | -4.19649677 | 0.40162182  |
| C | 3.50669946 | -2.96427201 | -2.95815174 | H  | 1.18667546  | -2.47408886 | 0.46831912  |
| C | 3.40763135 | -4.08653467 | -3.78650534 | Ag | -1.92869346 | 0.10293500  | 0.14999862  |
| H | 3.23737887 | -3.93458734 | -4.84974541 | Br | 0.01383634  | -0.41121142 | -1.91445538 |
| C | 3.52374267 | -5.38324491 | -3.28800576 | P  | -3.93791357 | -1.54422720 | 0.49517083  |
| H | 3.44067647 | -6.23168781 | -3.96216316 | P  | -3.88364845 | 1.79478319  | -0.17604953 |
| C | 3.75340353 | -5.58367232 | -1.92882658 | C  | -4.06675857 | -2.86313347 | 1.78047702  |
| H | 3.86082555 | -6.58740361 | -1.52677552 | C  | -3.62709269 | -2.60467274 | 3.10061438  |
| C | 3.84727174 | -4.48442027 | -1.08033826 | C  | -3.69464905 | -3.64187447 | 4.03800416  |
| H | 4.03457458 | -4.64482827 | -0.02296861 | C  | -4.17751594 | -4.90549176 | 3.70315393  |
| C | 3.88741969 | -2.49837592 | 1.27547371  | C  | -4.61412792 | -5.15394895 | 2.40473599  |
| C | 2.74509136 | -3.11194957 | 1.84382220  | C  | -4.55796280 | -4.13591975 | 1.45432737  |
| C | 2.83428239 | -3.55803861 | 3.16722998  | C  | -4.45954151 | -2.37816963 | -1.06225073 |

|   |             |             |             |    |             |             |             |
|---|-------------|-------------|-------------|----|-------------|-------------|-------------|
| C | -3.56165833 | -3.25657579 | -1.71727521 | H  | -7.06212196 | -2.48122671 | -3.27304309 |
| C | -3.96252712 | -3.83101230 | -2.92901779 | H  | -6.40906389 | -1.45577921 | -1.13394878 |
| C | -5.20546056 | -3.55888914 | -3.49757518 | H  | -3.10543359 | 2.98447625  | -4.93512791 |
| C | -6.08662111 | -2.70025241 | -2.84703524 | H  | -6.49279884 | -2.02758849 | 1.78565458  |
| C | -5.71207284 | -2.11835914 | -1.63696942 | H  | -5.33446053 | 2.24591938  | -5.70505828 |
| C | -5.35213113 | -0.42374907 | 0.91091370  | H  | -8.41362197 | -0.62224592 | 2.42134025  |
| C | -6.47413719 | -0.96559611 | 1.55823923  | H  | -6.97597476 | 1.34125698  | -4.05615862 |
| C | -7.56037811 | -0.17366569 | 1.91973709  | H  | -8.38281523 | 1.82214570  | 1.91064965  |
| C | -7.54307296 | 1.18990637  | 1.63502476  | H  | -6.35566970 | 1.18671000  | -1.67668823 |
| C | -6.43884382 | 1.74541635  | 0.99466543  | H  | -6.43066623 | 2.81068298  | 0.78197876  |
| C | -5.33320458 | 0.96305615  | 0.62355860  | H  | -3.91536952 | -0.50025839 | 3.49480176  |
| C | -3.97641813 | 3.51051693  | 0.49944935  | H  | -2.74352554 | -1.29063585 | 4.55744369  |
| C | -3.56033696 | 3.76995188  | 1.82693117  | H  | -2.30726343 | -0.89891463 | 2.88625874  |
| C | -3.60846196 | 5.08936291  | 2.29108226  | H  | -4.21238444 | -5.68947819 | 4.45525560  |
| C | -4.04737858 | 6.13765634  | 1.48424683  | H  | -1.60431525 | -2.71733794 | -0.96942309 |
| C | -4.45859857 | 5.87724335  | 0.18001127  | H  | -2.31170082 | -4.13574309 | -0.18638129 |
| C | -4.42267141 | 4.57037227  | -0.30335177 | H  | -1.66399558 | -4.26122967 | -1.82895991 |
| C | -4.36964406 | 1.98096528  | -1.94269761 | H  | -3.35759435 | -3.44840007 | 5.05403763  |
| C | -3.43458409 | 2.49882936  | -2.87262076 | H  | -2.77623120 | 3.09587580  | 3.71331060  |
| C | -3.81660341 | 2.58392005  | -4.21622292 | H  | -3.89595457 | 1.95683018  | 2.95471311  |
| C | -5.07400079 | 2.16995263  | -4.65252155 | H  | -2.25166412 | 2.11814553  | 2.33340254  |
| C | -5.98951460 | 1.66427972  | -3.73434957 | H  | -3.29091710 | 5.29448267  | 3.31108381  |
| C | -5.63470051 | 1.57454592  | -2.38923759 | H  | -1.52018867 | 3.36367999  | -3.32963904 |
| C | -3.12055000 | -1.25546646 | 3.53095940  | H  | -2.11238995 | 3.76577681  | -1.71192132 |
| C | -2.21618777 | -3.61050135 | -1.14444454 | H  | -1.46922463 | 2.15158949  | -2.04270609 |
| C | -3.09603032 | 2.67964982  | 2.75322352  |    |             |             |             |
| C | -2.06453757 | 2.97072837  | -2.46553845 |    |             |             |             |
| H | -4.99865561 | -6.13189916 | 2.12729813  |    |             |             |             |
| H | -4.06774377 | 7.15140903  | 1.87587112  | Ag | -0.299609   | -0.078970   | 0.056479    |
| H | -4.90086054 | -4.33588615 | 0.44311195  | Br | -0.013009   | 0.377841    | 2.641733    |
| H | -4.80841511 | 6.68165193  | -0.46166972 | P  | 1.168780    | -0.013031   | -2.087232   |
| H | -3.27787798 | -4.50770096 | -3.43542635 | P  | -2.064647   | -0.879589   | -1.638718   |
| H | -4.74771917 | 4.37212031  | -1.32065651 | C  | 2.395787    | 1.284941    | -2.542471   |
| H | -5.48158953 | -4.01872765 | -4.44295124 | C  | 2.130298    | 2.647722    | -2.260933   |

**Table S7** Geometry data of **2** ( $S_0$  in  $\text{CH}_2\text{Cl}_2$ ,  $S_0$ ,  $S_1$ , and  $T_1$ )

$S_0$  optimization in  $\text{CH}_2\text{Cl}_2$ ; unit Å



|   |           |           |           |   |           |           |           |
|---|-----------|-----------|-----------|---|-----------|-----------|-----------|
| C | 3.113025  | 3.591318  | -2.598297 | C | -2.635978 | -2.857629 | 0.723990  |
| C | 4.319750  | 3.219918  | -3.202593 | C | -2.898648 | -3.798864 | 1.896332  |
| C | 4.570783  | 1.881296  | -3.482959 | H | 2.937266  | 4.640785  | -2.384886 |
| C | 3.610619  | 0.921298  | -3.149229 | H | 5.056503  | 3.980651  | -3.448397 |
| C | 2.060110  | -1.606685 | -2.340372 | H | 5.500566  | 1.577689  | -3.956902 |
| C | 2.934605  | -2.102411 | -1.341307 | H | 3.807236  | -0.123992 | -3.369561 |
| C | 3.523735  | -3.360425 | -1.543087 | H | 4.194373  | -3.748605 | -0.778818 |
| C | 3.268140  | -4.124118 | -2.681964 | H | 3.737335  | -5.097607 | -2.800105 |
| C | 2.400691  | -3.634023 | -3.659074 | H | 2.187403  | -4.215334 | -4.552237 |
| C | 1.800706  | -2.388130 | -3.481447 | H | 1.126286  | -2.015127 | -4.245864 |
| C | -0.071128 | 0.068626  | -3.459286 | H | 1.369584  | 0.826539  | -4.873115 |
| C | 0.331713  | 0.545269  | -4.718474 | H | -0.230646 | 1.048243  | -6.734712 |
| C | -0.572202 | 0.674178  | -5.773228 | H | -2.626005 | 0.423534  | -6.394750 |
| C | -1.909612 | 0.325855  | -5.583472 | H | -3.372152 | -0.415583 | -4.199073 |
| C | -2.328337 | -0.149628 | -4.341371 | H | -6.042793 | 2.107115  | -1.059020 |
| C | -1.431133 | -0.289617 | -3.268663 | H | -7.686231 | 0.305061  | -1.460834 |
| C | -3.859516 | -0.449083 | -1.643475 | H | -6.885585 | -2.005812 | -2.011576 |
| C | -4.308419 | 0.872139  | -1.353408 | H | -4.466637 | -2.468669 | -2.114198 |
| C | -5.693152 | 1.103645  | -1.295112 | H | -2.345765 | -5.519790 | 0.151806  |
| C | -6.622346 | 0.090102  | -1.523090 | H | -1.801175 | -6.599710 | -1.991669 |
| C | -6.175643 | -1.204029 | -1.825203 | H | -1.421369 | -5.206417 | -4.026582 |
| C | -4.806392 | -1.462443 | -1.884481 | H | -1.570196 | -2.747800 | -3.864043 |
| C | -2.033637 | -2.718038 | -1.755330 | H | 0.714645  | 2.511701  | -0.669400 |
| C | -2.263904 | -3.502384 | -0.596464 | H | -0.005737 | 2.741675  | -2.246009 |
| C | -2.172113 | -4.897776 | -0.720371 | H | 0.701214  | 5.161894  | -2.233441 |
| C | -1.866323 | -5.515819 | -1.938037 | H | 1.435196  | 4.927644  | -0.634365 |
| C | -1.652764 | -4.741404 | -3.071913 | H | -0.308325 | 4.737072  | -0.845669 |
| C | -1.736495 | -3.348569 | -2.975350 | H | 3.160764  | -2.018318 | 0.777349  |
| C | 0.828530  | 3.070182  | -1.610198 | H | 2.620768  | -0.505753 | 0.081798  |
| C | 0.662907  | 4.559308  | -1.318892 | H | 4.911145  | -0.098532 | -0.866901 |
| C | 3.301635  | -1.348298 | -0.081065 | H | 5.461208  | -1.653759 | -0.220212 |
| C | 4.747520  | -0.835138 | -0.073796 | H | 4.974991  | -0.358034 | 0.885921  |
| C | -3.394286 | 2.054980  | -1.122193 | H | -2.380324 | 1.716588  | -0.881920 |
| C | -3.342201 | 3.010195  | -2.321778 | H | -3.747868 | 2.606773  | -0.241742 |

|                                     |             |             |             |   |             |             |             |
|-------------------------------------|-------------|-------------|-------------|---|-------------|-------------|-------------|
| H                                   | -4.338485   | 3.401411    | -2.556985   | C | -4.91136300 | -2.40818500 | 1.19522900  |
| H                                   | -2.960302   | 2.505231    | -3.214928   | C | -5.84165100 | -1.54291900 | 1.76078400  |
| H                                   | -2.688855   | 3.862627    | -2.106002   | C | -5.50953000 | -0.20354700 | 1.95278200  |
| H                                   | -3.525870   | -2.231433   | 0.570663    | C | -4.24720900 | 0.24574200  | 1.57902100  |
| H                                   | -1.839255   | -2.154664   | 1.010939    | C | -2.01809600 | 1.82293800  | 0.17678900  |
| H                                   | -3.161680   | -3.213807   | 2.783567    | C | -2.66444400 | 2.17449100  | -1.03646900 |
| H                                   | -2.015076   | -4.397227   | 2.145434    | C | -2.90423600 | 3.53068100  | -1.27679200 |
| H                                   | -3.729226   | -4.484410   | 1.692609    | C | -2.52312700 | 4.51951900  | -0.37037900 |
|                                     |             |             |             | C | -1.88666400 | 4.16702300  | 0.81383100  |
|                                     |             |             |             | C | -1.63860800 | 2.82193700  | 1.08123400  |
| S <sub>0</sub> optimization: unit Å |             |             |             | C | 2.39089300  | -2.83722500 | 0.53069200  |
| Ag                                  | -0.01419800 | -0.87833800 | -1.24387000 | C | 2.72113300  | -4.32601300 | 0.58609100  |
| Br                                  | -0.05907300 | -2.22539700 | -3.36801300 | C | 2.23054200  | 1.78193500  | -2.37833200 |
| P                                   | 1.67138600  | 0.21800300  | 0.39690200  | C | 3.65412100  | 1.35368300  | -2.75751900 |
| P                                   | -1.65278100 | 0.05391100  | 0.51949800  | C | -2.69359200 | -3.00613800 | 0.21542700  |
| C                                   | 3.34161100  | -0.47493400 | 0.75516400  | C | -1.76615600 | -3.65703800 | 1.24845100  |
| C                                   | 3.53949500  | -1.87964600 | 0.76956600  | C | -3.09782700 | 1.11609000  | -2.02989400 |
| C                                   | 4.83278000  | -2.35498300 | 1.00811600  | C | -3.70012000 | 1.61423500  | -3.34046000 |
| C                                   | 5.90903500  | -1.49399900 | 1.21740000  | H | 5.00809900  | -3.42594100 | 1.02494800  |
| C                                   | 5.71080800  | -0.11847900 | 1.19215900  | H | 6.90024000  | -1.90378000 | 1.39509700  |
| C                                   | 4.43132600  | 0.38278100  | 0.96117100  | H | 6.54066200  | 0.56558100  | 1.34952200  |
| C                                   | 1.96155100  | 2.02651700  | 0.18525600  | H | 4.27954700  | 1.45769100  | 0.93754300  |
| C                                   | 2.17001000  | 2.58350000  | -1.09858300 | H | 2.52500200  | 4.40449800  | -2.17362500 |
| C                                   | 2.37401300  | 3.96805600  | -1.18829400 | H | 2.54637800  | 5.85952000  | -0.17967200 |
| C                                   | 2.38616800  | 4.79009000  | -0.06720300 | H | 2.19049600  | 4.86216200  | 2.08304300  |
| C                                   | 2.18562800  | 4.23558700  | 1.19476600  | H | 1.80707300  | 2.43932700  | 2.29645800  |
| C                                   | 1.97139800  | 2.86631800  | 1.31135100  | H | 2.59249300  | -0.02431500 | 3.16309100  |
| C                                   | 0.77773300  | 0.08349200  | 2.01157200  | H | 1.46017500  | -0.26253900 | 5.34279200  |
| C                                   | 1.50656900  | -0.03355800 | 3.20421200  | H | -1.03302000 | -0.30668500 | 5.44345700  |
| C                                   | 0.86935600  | -0.17149100 | 4.43493800  | H | -2.34669000 | -0.13223500 | 3.36858000  |
| C                                   | -0.52127000 | -0.19652300 | 4.49082200  | H | -5.18057600 | -3.44939200 | 1.02983700  |
| C                                   | -1.26285900 | -0.09160800 | 3.31651100  | H | -6.82633200 | -1.91081600 | 2.03829100  |
| C                                   | -0.64067400 | 0.04639200  | 2.06690500  | H | -6.22772100 | 0.48993700  | 2.38260200  |
| C                                   | -3.29464900 | -0.62497800 | 1.02183600  | H | -3.99633700 | 1.29497900  | 1.71033300  |
| C                                   | -3.63073000 | -1.98313300 | 0.81310100  |   |             |             |             |

|                                     |             |             |             |   |             |             |             |
|-------------------------------------|-------------|-------------|-------------|---|-------------|-------------|-------------|
| H                                   | -3.39896600 | 3.82490500  | -2.19715600 | C | -5.52513600 | -0.79201200 | -1.26810300 |
| H                                   | -2.72468000 | 5.56377200  | -0.59613200 | C | -4.29608300 | -0.14451200 | -1.16442800 |
| H                                   | -1.58000200 | 4.92711500  | 1.52725200  | C | -2.03925000 | 1.88659000  | -0.72148400 |
| H                                   | -1.13972100 | 2.54661800  | 2.00561400  | C | -2.65777600 | 2.55801500  | 0.35323600  |
| H                                   | 1.95303900  | -2.61563100 | -0.45489600 | C | -2.84961300 | 3.94081400  | 0.24055800  |
| H                                   | 1.59541100  | -2.62663000 | 1.25940000  | C | -2.46388100 | 4.64848600  | -0.89404400 |
| H                                   | 3.10873400  | -4.62549900 | 1.56701700  | C | -1.85792900 | 3.97875600  | -1.95518800 |
| H                                   | 3.45747300  | -4.60585400 | -0.17545100 | C | -1.63589700 | 2.60896800  | -1.86155700 |
| H                                   | 1.81604500  | -4.91025400 | 0.39249600  | C | -0.61280600 | -0.35663900 | -2.07724300 |
| H                                   | 1.81219200  | 2.39078000  | -3.18940400 | C | -1.24106100 | -0.50626200 | -3.33571300 |
| H                                   | 1.59804100  | 0.88893900  | -2.31380900 | C | -0.52857500 | -0.74603300 | -4.49392600 |
| H                                   | 4.09741000  | 0.71515900  | -1.98645900 | C | 0.89981300  | -0.82652500 | -4.43992600 |
| H                                   | 4.30714900  | 2.22468500  | -2.88841500 | C | 1.54867800  | -0.65357700 | -3.23496700 |
| H                                   | 3.64115400  | 0.78873900  | -3.69561900 | C | 0.85102100  | -0.41941600 | -2.02311700 |
| H                                   | -2.09279600 | -2.56042800 | -0.58627600 | C | 3.20240200  | -1.17721300 | -0.40947300 |
| H                                   | -3.29601800 | -3.78849700 | -0.26183400 | C | 3.07157400  | -2.56419400 | -0.17171500 |
| H                                   | -2.34061400 | -4.15511700 | 2.03834900  | C | 4.23692800  | -3.33275400 | -0.07319700 |
| H                                   | -1.11668000 | -2.91646500 | 1.72830400  | C | 5.50398700  | -2.77636300 | -0.22242300 |
| H                                   | -1.12784500 | -4.40489800 | 0.76551200  | C | 5.62801900  | -1.41415400 | -0.48158000 |
| H                                   | -3.82088500 | 0.44770300  | -1.54104100 | C | 4.48565500  | -0.62434900 | -0.56847100 |
| H                                   | -2.23532100 | 0.47540000  | -2.26715500 | C | 2.44577400  | 1.64568000  | -0.58200700 |
| H                                   | -3.93973900 | 0.75905800  | -3.98017000 | C | 2.99982300  | 2.27616500  | 0.56239400  |
| H                                   | -2.99947200 | 2.25100800  | -3.89256000 | C | 3.42249900  | 3.60275500  | 0.43362000  |
| H                                   | -4.62579300 | 2.17979500  | -3.18101000 | C | 3.30841900  | 4.29972000  | -0.76919900 |
|                                     |             |             |             | C | 2.75392500  | 3.67798600  | -1.88237700 |
| S <sub>1</sub> optimization: unit Å |             |             |             | C | 2.31560200  | 2.35987600  | -1.77976400 |
| Ag                                  | 0.02625200  | -0.24748900 | 1.26502600  | C | -2.06650800 | -2.90970200 | 0.26707500  |
| Br                                  | -0.45868800 | -0.60699900 | 3.75219600  | C | -2.27010800 | -4.38048200 | 0.61772000  |
| P                                   | -1.57719200 | 0.10184100  | -0.64600600 | C | -3.11135500 | 1.87103400  | 1.62409700  |
| P                                   | 1.74509700  | -0.06387000 | -0.52710700 | C | -4.62367600 | 1.94890500  | 1.86359800  |
| C                                   | -3.16427700 | -0.81281500 | -0.66945600 | C | 1.74528800  | -3.27597500 | -0.06395100 |
| C                                   | -3.27038200 | -2.16516900 | -0.25946200 | C | 1.40541100  | -4.07619400 | -1.32189500 |
| C                                   | -4.51684800 | -2.78641700 | -0.36563300 | C | 3.13327200  | 1.54169200  | 1.88106400  |
| C                                   | -5.63528700 | -2.11704100 | -0.86265600 | C | 3.78327500  | 2.30836200  | 3.02927000  |

|   |             |             |             |                                     |             |             |             |
|---|-------------|-------------|-------------|-------------------------------------|-------------|-------------|-------------|
| H | -4.62052000 | -3.82071100 | -0.05323400 | H                                   | 0.45901000  | -4.61407900 | -1.20314200 |
| H | -6.58790600 | -2.63608000 | -0.93156000 | H                                   | 3.69466400  | 0.61243500  | 1.71667000  |
| H | -6.38546200 | -0.25859100 | -1.66387500 | H                                   | 2.13377000  | 1.21619500  | 2.20795000  |
| H | -4.21315400 | 0.89116900  | -1.47775800 | H                                   | 3.82202500  | 1.67235100  | 3.91941300  |
| H | -3.30950400 | 4.41401200  | 1.01018100  | H                                   | 3.21626000  | 3.20808400  | 3.29369100  |
| H | -2.62790000 | 5.72208100  | -0.94409800 | H                                   | 4.81011400  | 2.60866200  | 2.78993500  |
| H | -1.54836200 | 4.51929800  | -2.84514400 |                                     |             |             |             |
| H | -1.14503700 | 2.08179400  | -2.61449100 |                                     |             |             |             |
| H | -2.32803800 | -0.46551200 | -3.38375000 | T <sub>1</sub> optimization: unit Å |             |             |             |
| H | -1.05271600 | -0.90656300 | -5.43132800 | Ag                                  | 0.00369900  | -0.30374300 | 1.24796100  |
| H | 1.47073700  | -1.04567900 | -5.33760900 | Br                                  | 0.43051100  | -0.79264200 | 3.65763400  |
| H | 2.63489700  | -0.72816000 | -3.20326800 | P                                   | -1.63711800 | 0.05698400  | -0.58493800 |
| H | 4.13983000  | -4.39814200 | 0.12688400  | P                                   | 1.63127100  | -0.00747700 | -0.68390200 |
| H | 6.38721600  | -3.40435300 | -0.13822000 | C                                   | -3.21529200 | -0.85492400 | -0.47388500 |
| H | 6.60181900  | -0.96218800 | -0.61261800 | C                                   | -3.27629100 | -2.21209000 | -0.06289000 |
| H | 4.58942500  | 0.43832100  | -0.16586800 | C                                   | -4.52122700 | -2.84361900 | -0.07683400 |
| H | 3.85172500  | 4.10871100  | 1.29288600  | C                                   | -5.68162800 | -2.18316100 | -0.48418500 |
| H | 3.64903300  | 5.33058500  | -0.82781900 | C                                   | -5.61615700 | -0.85486000 | -0.89047600 |
| H | 2.65576700  | 4.21131700  | -2.82430500 | C                                   | -4.38966300 | -0.19565300 | -0.87815900 |
| H | 1.86537300  | 1.87041000  | -2.63858500 | C                                   | -2.10655200 | 1.84264400  | -0.60647300 |
| H | -1.69715800 | -2.38732600 | 1.16277300  | C                                   | -2.58526100 | 2.51685200  | 0.53964800  |
| H | -1.26723700 | -2.82532800 | -0.48288300 | C                                   | -2.83380100 | 3.89130100  | 0.43361400  |
| H | -2.59450100 | -4.96602400 | -0.25024000 | C                                   | -2.63665000 | 4.58602200  | -0.75610400 |
| H | -3.01074800 | -4.50893500 | 1.41494300  | C                                   | -2.16989400 | 3.91190500  | -1.88281100 |
| H | -1.32911700 | -4.80977000 | 0.91681200  | C                                   | -1.89522000 | 2.55091300  | -1.79916300 |
| H | -2.58901700 | 2.32885800  | 2.41514500  | C                                   | -0.78215300 | -0.39023500 | -2.07393500 |
| H | -2.80977800 | 0.81923900  | 1.62826000  | C                                   | -1.48758200 | -0.71746800 | -3.25869600 |
| H | -5.17585400 | 1.44932400  | 1.06099500  | C                                   | -0.83858000 | -1.08354900 | -4.41924600 |
| H | -4.97323100 | 2.98596300  | 1.91933900  | C                                   | 0.59055000  | -1.15330600 | -4.44277200 |
| H | -4.88142100 | 1.45776600  | 2.80825800  | C                                   | 1.31265800  | -0.85159000 | -3.31090500 |
| H | 0.94173900  | -2.55730300 | 0.13479500  | C                                   | 0.67975500  | -0.45874400 | -2.09749600 |
| H | 1.77329100  | -3.95043900 | 0.80205300  | C                                   | 3.17874500  | -0.97190100 | -0.62558800 |
| H | 2.18451600  | -4.81574800 | -1.54488300 | C                                   | 3.20014100  | -2.35027400 | -0.30924100 |
| H | 1.31161200  | -3.41498100 | -2.19456100 | C                                   | 4.43841400  | -3.00236000 | -0.29508500 |
|   |             |             |             | C                                   | 5.62574600  | -2.34238300 | -0.59943900 |

|   |             |             |             |    |             |             |             |
|---|-------------|-------------|-------------|----|-------------|-------------|-------------|
| C | 5.59723400  | -0.98919900 | -0.92948200 | H  | 1.85429300  | 4.38075000  | -2.88554300 |
| C | 4.38381100  | -0.31076200 | -0.93290300 | H  | 1.34396100  | 1.95835400  | -2.69702100 |
| C | 2.13352600  | 1.76633700  | -0.70739300 | H  | -1.60845500 | -2.43356700 | 1.25157200  |
| C | 2.72554300  | 2.42679600  | 0.40098200  | H  | -1.27912800 | -2.84916200 | -0.42201600 |
| C | 2.98505400  | 3.79466100  | 0.27111400  | H  | -2.56956100 | -5.00645500 | -0.12758700 |
| C | 2.68100200  | 4.49811100  | -0.89473700 | H  | -2.88142600 | -4.56986600 | 1.56601300  |
| C | 2.09614900  | 3.84239900  | -1.97301200 | H  | -1.22882700 | -4.84602900 | 1.01691200  |
| C | 1.81380200  | 2.48330100  | -1.86940600 | H  | -2.26859400 | 2.36439400  | 2.64638000  |
| C | -2.03089300 | -2.94908400 | 0.37407000  | H  | -2.47224900 | 0.81369500  | 1.86676800  |
| C | -2.19601500 | -4.42529200 | 0.72341000  | H  | -4.92370100 | 1.26576300  | 1.54554400  |
| C | -2.84595000 | 1.84384000  | 1.87045000  | H  | -4.73718100 | 2.83916400  | 2.33884700  |
| C | -4.32563400 | 1.82563200  | 2.27177600  | H  | -4.44604100 | 1.34873900  | 3.25065800  |
| C | 1.96734200  | -3.17212800 | -0.02087600 | H  | 1.12563100  | -2.52342700 | 0.24754600  |
| C | 1.56743300  | -4.06422300 | -1.20293800 | H  | 2.15941300  | -3.79437500 | 0.86265000  |
| C | 3.08855600  | 1.68216700  | 1.66820200  | H  | 2.38358600  | -4.74186000 | -1.47864600 |
| C | 3.55637200  | 2.53033700  | 2.84736100  | H  | 1.31513700  | -3.46163000 | -2.08118200 |
| H | -4.59190500 | -3.87998500 | 0.23786700  | H  | 0.69639800  | -4.67711000 | -0.94570300 |
| H | -6.63138000 | -2.71187000 | -0.48272500 | H  | 3.86629100  | 0.94271800  | 1.43187700  |
| H | -6.51020400 | -0.32852800 | -1.21464100 | H  | 2.22624800  | 1.08629400  | 2.00002600  |
| H | -4.34104900 | 0.84345700  | -1.19009400 | H  | 3.72884900  | 1.88428100  | 3.71372300  |
| H | -3.18729400 | 4.42727900  | 1.31239800  | H  | 2.80366500  | 3.27301700  | 3.13540700  |
| H | -2.84004900 | 5.65315000  | -0.79966900 | H  | 4.49430200  | 3.05652300  | 2.63408200  |
| H | -2.01088000 | 4.44241700  | -2.81799500 |    |             |             |             |
| H | -1.51154300 | 2.01765700  | -2.66502000 |    |             |             |             |
| H | -2.57582600 | -0.69510200 | -3.24126600 |    |             |             |             |
| H | -1.41342300 | -1.34081800 | -5.30432500 |    |             |             |             |
| H | 1.10666000  | -1.46726700 | -5.34590500 | Ag | -0.071214   | -0.047293   | 0.110328    |
| H | 2.39833800  | -0.92747900 | -3.33384300 | Br | 0.208721    | -0.329779   | 2.731119    |
| H | 4.46456200  | -4.05843700 | -0.03412800 | P  | 1.473113    | -0.011071   | -1.981557   |
| H | 6.56833000  | -2.88329700 | -0.57736500 | P  | -1.896189   | 0.177546    | -1.698552   |
| H | 6.51345800  | -0.46039400 | -1.17855500 | C  | 3.025277    | -0.983556   | -2.242642   |
| H | 4.36492700  | 0.74613300  | -1.18200100 | C  | 3.154596    | -2.306901   | -1.761749   |
| H | 3.43677500  | 4.32848100  | 1.10148100  | C  | 4.380832    | -2.960138   | -1.950031   |
| H | 2.89951900  | 5.56165700  | -0.95224500 | C  | 5.453059    | -2.350815   | -2.594086   |

**Table S8** Geometry data of **3** ( $S_0$  in  $\text{CH}_2\text{Cl}_2$ ,  $S_0$ ,  $S_1$ , and  $T_1$ )

$S_0$  optimization in  $\text{CH}_2\text{Cl}_2$ ; unit Å

|   |           |           |           |   |           |           |           |
|---|-----------|-----------|-----------|---|-----------|-----------|-----------|
| C | 5.317772  | -1.050660 | -3.075228 | C | -2.559524 | -4.072839 | -1.483843 |
| C | 4.112268  | -0.378127 | -2.896619 | C | -3.041867 | 2.406815  | 0.300431  |
| C | 1.945592  | 1.697173  | -2.498856 | C | -2.154470 | 3.121731  | 1.328007  |
| C | 2.644200  | 2.547924  | -1.609416 | C | -4.529316 | 2.615464  | 0.621110  |
| C | 2.957796  | 3.841964  | -2.047226 | H | 4.497106  | -3.976866 | -1.582932 |
| C | 2.609560  | 4.298310  | -3.315189 | H | 6.387839  | -2.890886 | -2.720568 |
| C | 1.930763  | 3.453046  | -4.189555 | H | 6.141524  | -0.559349 | -3.586219 |
| C | 1.604566  | 2.163612  | -3.778672 | H | 4.014729  | 0.635501  | -3.272299 |
| C | 0.340292  | -0.610153 | -3.315354 | H | 3.494235  | 4.508941  | -1.376740 |
| C | 0.889120  | -1.209205 | -4.459960 | H | 2.871760  | 5.308661  | -3.618470 |
| C | 0.082939  | -1.709563 | -5.479388 | H | 1.656026  | 3.790514  | -5.185314 |
| C | -1.302139 | -1.619968 | -5.368303 | H | 1.080821  | 1.508114  | -4.467121 |
| C | -1.866328 | -1.033644 | -4.238027 | H | 1.968546  | -1.287031 | -4.552363 |
| C | -1.071380 | -0.522252 | -3.200207 | H | 0.538531  | -2.167612 | -6.353090 |
| C | -3.577060 | -0.593871 | -1.717604 | H | -1.945275 | -2.006681 | -6.154143 |
| C | -3.798164 | -1.892188 | -1.203767 | H | -2.947750 | -0.975507 | -4.157066 |
| C | -5.109914 | -2.387702 | -1.207532 | H | -5.297804 | -3.382504 | -0.811143 |
| C | -6.178648 | -1.649287 | -1.705723 | H | -7.181146 | -2.069147 | -1.691928 |
| C | -5.953742 | -0.375416 | -2.222788 | H | -6.774455 | 0.214149  | -2.622625 |
| C | -4.661940 | 0.142677  | -2.223813 | H | -4.493593 | 1.137313  | -2.624886 |
| C | -2.224790 | 1.945895  | -2.110647 | H | -3.269471 | 4.873565  | -0.732646 |
| C | -2.705741 | 2.835576  | -1.120369 | H | -2.804156 | 5.689251  | -3.006336 |
| C | -2.900003 | 4.175944  | -1.480285 | H | -1.974804 | 4.103910  | -4.748819 |
| C | -2.640425 | 4.641886  | -2.766117 | H | -1.618249 | 1.737872  | -4.170732 |
| C | -2.177178 | 3.759159  | -3.738384 | H | 1.154932  | -2.403463 | -1.018874 |
| C | -1.973868 | 2.422223  | -3.407087 | H | 3.266016  | -4.102644 | 0.408382  |
| C | 2.032422  | -3.061402 | -1.067697 | H | 1.566987  | -3.922595 | 0.872879  |
| C | 2.406505  | -3.422701 | 0.376400  | H | 2.659043  | -2.528394 | 0.955865  |
| C | 1.620496  | -4.307670 | -1.864438 | H | 0.781072  | -4.811583 | -1.372451 |
| C | 3.087379  | 2.122317  | -0.217844 | H | 2.444015  | -5.027958 | -1.934377 |
| C | 2.433792  | 2.987624  | 0.867742  | H | 1.313050  | -4.046492 | -2.882916 |
| C | 4.616754  | 2.128888  | -0.078779 | H | 2.753641  | 1.090453  | -0.050356 |
| C | -2.689982 | -2.781332 | -0.663791 | H | 2.763244  | 4.031317  | 0.801024  |
| C | -2.890099 | -3.086075 | 0.827225  | H | 2.699687  | 2.612981  | 1.862458  |

|                                     |             |             |             |   |             |             |             |
|-------------------------------------|-------------|-------------|-------------|---|-------------|-------------|-------------|
| H                                   | 1.342165    | 2.972730    | 0.781894    | C | 2.18795500  | 3.80976400  | -2.22721400 |
| H                                   | 4.904911    | 1.764913    | 0.914280    | C | 1.88326000  | 2.46507600  | -2.04023800 |
| H                                   | 5.025143    | 3.139867    | -0.194830   | C | 0.72172200  | -0.39849200 | -2.10529300 |
| H                                   | 5.088891    | 1.483949    | -0.827291   | C | 1.40058900  | -0.81877300 | -3.25943000 |
| H                                   | -1.739332   | -2.240701   | -0.758330   | C | 0.71383400  | -1.22365000 | -4.40091100 |
| H                                   | -2.939171   | -2.164411   | 1.417033    | C | -0.67857900 | -1.21956300 | -4.40482800 |
| H                                   | -2.056985   | -3.688075   | 1.207630    | C | -1.37051700 | -0.80981900 | -3.26816300 |
| H                                   | -3.815024   | -3.649169   | 0.999152    | C | -0.69705000 | -0.39295300 | -2.10954100 |
| H                                   | -2.375350   | -3.856424   | -2.541836   | C | -3.29867100 | -0.77052100 | -0.85399300 |
| H                                   | -3.467560   | -4.683400   | -1.416987   | C | -3.50946500 | -2.10706300 | -0.44526000 |
| H                                   | -1.726245   | -4.677208   | -1.108329   | C | -4.78922000 | -2.65286000 | -0.61985900 |
| H                                   | -2.841446   | 1.332131    | 0.394221    | C | -5.83294900 | -1.92885500 | -1.18503500 |
| H                                   | -2.376276   | 2.759404    | 2.338096    | C | -5.61734500 | -0.61558000 | -1.59543000 |
| H                                   | -2.320184   | 4.205517    | 1.315262    | C | -4.35955700 | -0.04600400 | -1.42511300 |
| H                                   | -1.092915   | 2.939489    | 1.130378    | C | -2.06884000 | 1.85383800  | -0.81629100 |
| H                                   | -4.800996   | 3.677254    | 0.590376    | C | -2.66697300 | 2.57915200  | 0.24160200  |
| H                                   | -4.751658   | 2.243913    | 1.628169    | C | -2.92227500 | 3.94150200  | 0.03759000  |
| H                                   | -5.169867   | 2.080448    | -0.087736   | C | -2.60588900 | 4.58398500  | -1.15529200 |
|                                     |             |             |             | C | -2.01861100 | 3.86370700  | -2.19162500 |
|                                     |             |             |             | C | -1.75592700 | 2.50830400  | -2.01774400 |
| S <sub>0</sub> optimization: unit Å |             |             |             |   |             |             |             |
| Ag                                  | -0.00052100 | -0.32092500 | 1.33610700  | C | 2.27261100  | -3.06244400 | 0.02119200  |
| Br                                  | 0.02505200  | -0.86363100 | 3.79441100  | C | 2.49372200  | -3.53244200 | 1.46531000  |
| P                                   | 1.68917700  | 0.04891300  | -0.59335900 | C | 2.01474800  | -4.24540100 | -0.92339500 |
| P                                   | -1.66932500 | 0.06680400  | -0.60327100 | C | 3.05378300  | 1.93818600  | 1.59970000  |
| C                                   | 3.29427200  | -0.83982900 | -0.81652000 | C | 2.28715200  | 2.63118700  | 2.73410800  |
| C                                   | 3.42648000  | -2.20449900 | -0.47199500 | C | 4.56523500  | 1.94572200  | 1.87156600  |
| C                                   | 4.69021600  | -2.79592300 | -0.60465400 | C | -2.42815300 | -2.98272200 | 0.16694500  |
| C                                   | 5.79406000  | -2.08868800 | -1.06854700 | C | -2.76211700 | -3.35895500 | 1.61703100  |
| C                                   | 5.65544800  | -0.74828100 | -1.41923500 | C | -2.16381100 | -4.22865500 | -0.69017800 |
| C                                   | 4.41353100  | -0.13414200 | -1.28983800 | C | -3.06312800 | 1.95290300  | 1.57090300  |
| C                                   | 2.13956200  | 1.82245400  | -0.81897900 | C | -2.33438700 | 2.61203000  | 2.74944400  |
| C                                   | 2.72241300  | 2.54961600  | 0.24614400  | C | -4.58467500 | 1.98314900  | 1.77747200  |
| C                                   | 3.02050800  | 3.90133100  | 0.02887600  | H | 4.81101500  | -3.84249500 | -0.33580200 |
| C                                   | 2.76071100  | 4.53172400  | -1.18378600 | H | 6.75786200  | -2.58407900 | -1.15595300 |

|   |             |             |             |                                     |             |             |             |
|---|-------------|-------------|-------------|-------------------------------------|-------------|-------------|-------------|
| H | 6.50549500  | -0.18036700 | -1.78855600 | H                                   | -1.94810400 | -3.94782500 | 2.05357100  |
| H | 4.31114300  | 0.91344400  | -1.55654200 | H                                   | -3.68083300 | -3.95559400 | 1.67406100  |
| H | 3.47052800  | 4.47425800  | 0.83595100  | H                                   | -1.87971000 | -3.95872200 | -1.71340500 |
| H | 3.00660000  | 5.58299600  | -1.31182000 | H                                   | -3.04765400 | -4.87519900 | -0.74570400 |
| H | 1.97940300  | 4.28590800  | -3.18176000 | H                                   | -1.35155500 | -4.82065800 | -0.25374700 |
| H | 1.44172400  | 1.90365800  | -2.85788900 | H                                   | -2.75986800 | 0.89826500  | 1.56297400  |
| H | 2.48695000  | -0.83549800 | -3.25698500 | H                                   | -2.57358600 | 2.08901500  | 3.68118600  |
| H | 1.26735800  | -1.54507500 | -5.27951200 | H                                   | -2.62317100 | 3.66402400  | 2.86446200  |
| H | -1.22877600 | -1.53837900 | -5.28646500 | H                                   | -1.24872000 | 2.56877200  | 2.61951200  |
| H | -2.45670100 | -0.82023400 | -3.27446500 | H                                   | -4.95968000 | 3.01223900  | 1.83613700  |
| H | -4.97034900 | -3.67685800 | -0.30254000 | H                                   | -4.84559600 | 1.47957900  | 2.71537200  |
| H | -6.81074400 | -2.38923400 | -1.30122300 | H                                   | -5.11088500 | 1.47650700  | 0.96170800  |
| H | -6.42037900 | -0.03444900 | -2.04147900 |                                     |             |             |             |
| H | -4.19796600 | 0.98224800  | -1.73521100 |                                     |             |             |             |
| H | -3.38405800 | 4.51334700  | 0.83876300  | S <sub>1</sub> optimization: unit Å |             |             |             |
| H | -2.81938900 | 5.64344500  | -1.27343100 | Ag                                  | -0.00827500 | -0.29242100 | -1.13368900 |
| H | -1.76600800 | 4.34934500  | -3.13056800 | Br                                  | 0.47283800  | -0.92978400 | -3.56451700 |
| H | -1.30343400 | 1.94793600  | -2.83009100 | P                                   | -1.66896900 | 0.13539100  | 0.66750500  |
| H | 1.36315000  | -2.44704100 | 0.02117200  | P                                   | 1.65918500  | 0.06220900  | 0.73318400  |
| H | 3.39288500  | -4.15487100 | 1.54943200  | C                                   | -3.31279000 | -0.69149600 | 0.71892000  |
| H | 1.63901600  | -4.12746300 | 1.80591100  | C                                   | -3.55297000 | -2.00678900 | 0.26260900  |
| H | 2.59437200  | -2.68384000 | 2.14902000  | C                                   | -4.85582200 | -2.50998900 | 0.36745300  |
| H | 1.14552300  | -4.81924400 | -0.58335000 | C                                   | -5.89563900 | -1.77142900 | 0.92447200  |
| H | 2.86993500  | -4.93095300 | -0.95280900 | C                                   | -5.64921400 | -0.48508900 | 1.39448000  |
| H | 1.82015800  | -3.90568200 | -1.94666700 | C                                   | -4.36971000 | 0.04949600  | 1.28091600  |
| H | 2.73320300  | 0.88874900  | 1.59662300  | C                                   | -2.07893100 | 1.94366400  | 0.68192600  |
| H | 2.59498800  | 3.67811100  | 2.84630600  | C                                   | -2.66530700 | 2.60196200  | -0.42380700 |
| H | 2.47004200  | 2.11701800  | 3.68322700  | C                                   | -2.86811600 | 3.98422900  | -0.32911700 |
| H | 1.20804000  | 2.61182800  | 2.55281800  | C                                   | -2.50708900 | 4.70703000  | 0.80504000  |
| H | 4.77535600  | 1.45312800  | 2.82781300  | C                                   | -1.92207900 | 4.05231700  | 1.88560200  |
| H | 4.95717400  | 2.96853600  | 1.93040700  | C                                   | -1.70540300 | 2.67931700  | 1.81630800  |
| H | 5.11717000  | 1.41550600  | 1.08834300  | C                                   | -0.77708800 | -0.28019300 | 2.16127000  |
| H | -1.49408600 | -2.40647000 | 0.19500700  | C                                   | -1.46245000 | -0.45388100 | 3.38264300  |
| H | -2.89000800 | -2.46792200 | 2.23927400  | C                                   | -0.80402200 | -0.64915400 | 4.58264900  |
|   |             |             |             | C                                   | 0.62666800  | -0.65241900 | 4.60663300  |



|   |             |             |             |   |             |             |             |
|---|-------------|-------------|-------------|---|-------------|-------------|-------------|
| C | 1.33144400  | -0.46683700 | 3.43677300  | H | -2.55082100 | -0.45969300 | 3.37237100  |
| C | 0.68826400  | -0.29227800 | 2.18293500  | H | -1.37012200 | -0.82591100 | 5.49218300  |
| C | 3.14277500  | -1.02172500 | 0.72888200  | H | 1.15876700  | -0.83242100 | 5.53652800  |
| C | 3.06094900  | -2.42274600 | 0.55366400  | H | 2.41984900  | -0.49377500 | 3.46481300  |
| C | 4.24872800  | -3.16138500 | 0.60619100  | H | 4.20099700  | -4.23890700 | 0.47078000  |
| C | 5.48558800  | -2.56436900 | 0.83200100  | H | 6.38456900  | -3.17455900 | 0.86589800  |
| C | 5.55858400  | -1.18788100 | 1.02240300  | H | 6.51213200  | -0.70350900 | 1.21599700  |
| C | 4.39539400  | -0.42690100 | 0.96748300  | H | 4.45873200  | 0.64451500  | 1.12440900  |
| C | 2.32662900  | 1.78749200  | 0.80064800  | H | 3.86741700  | 4.24734700  | -0.96589800 |
| C | 2.96094200  | 2.41792500  | -0.29624200 | H | 3.52644200  | 5.47027900  | 1.14123100  |
| C | 3.37876700  | 3.74519700  | -0.13437600 | H | 2.38156400  | 4.35107300  | 3.05758000  |
| C | 3.18560300  | 4.44144000  | 1.05494200  | H | 1.59967100  | 2.01815500  | 2.81309500  |
| C | 2.54616000  | 3.81875900  | 2.12441200  | H | -1.51439200 | -2.38923600 | -0.21487600 |
| C | 2.11082400  | 2.50516100  | 1.98816200  | H | -3.65607300 | -3.59744900 | -2.04646900 |
| C | -2.48146600 | -2.89316600 | -0.34696000 | H | -1.90059300 | -3.67257100 | -2.29593200 |
| C | -2.70869200 | -3.07956700 | -1.85370500 | H | -2.73652500 | -2.11772500 | -2.37610700 |
| C | -2.38051400 | -4.24447600 | 0.37269700  | H | -1.55592500 | -4.83339400 | -0.04439100 |
| C | -3.08657500 | 1.88309800  | -1.69780500 | H | -3.29496300 | -4.83664800 | 0.25215800  |
| C | -2.31767100 | 2.40276300  | -2.92068100 | H | -2.20227600 | -4.11166400 | 1.44489800  |
| C | -4.60249200 | 1.97001000  | -1.92507600 | H | -2.83990300 | 0.81892100  | -1.59042000 |
| C | 1.75309700  | -3.16851600 | 0.35884700  | H | -2.54693400 | 3.45638100  | -3.12004700 |
| C | 1.74625000  | -3.99206800 | -0.93568300 | H | -2.58551400 | 1.82588900  | -3.81288700 |
| C | 1.44204300  | -4.03657000 | 1.58685500  | H | -1.23503000 | 2.31519300  | -2.78167600 |
| C | 3.18297200  | 1.74144400  | -1.64071400 | H | -4.88389800 | 1.40451200  | -2.82112400 |
| C | 2.36850500  | 2.43862400  | -2.74045900 | H | -4.92496800 | 3.00775600  | -2.07237500 |
| C | 4.66706000  | 1.67359700  | -2.02715400 | H | -5.15746700 | 1.55938200  | -1.07558700 |
| H | -5.06104800 | -3.51350600 | 0.00343200  | H | 0.94719200  | -2.42562400 | 0.28128300  |
| H | -6.89139900 | -2.20230700 | 0.99168200  | H | 1.92949100  | -3.36324700 | -1.81265100 |
| H | -6.44441500 | 0.10537000  | 1.84214800  | H | 0.77345900  | -4.47918900 | -1.06853200 |
| H | -4.18626200 | 1.05963200  | 1.63377200  | H | 2.50673200  | -4.78136600 | -0.91461600 |
| H | -3.32213800 | 4.50936300  | -1.16627100 | H | 1.38553700  | -3.42780200 | 2.49450000  |
| H | -2.67964800 | 5.77993200  | 0.83995600  | H | 2.21298000  | -4.80259800 | 1.73459100  |
| H | -1.63175200 | 4.60390200  | 2.77593900  | H | 0.48238800  | -4.54913500 | 1.45943200  |
| H | -1.24676800 | 2.15936900  | 2.65255200  | H | 2.82245600  | 0.70758500  | -1.57437000 |

|                                     |             |             |             |   |             |             |             |
|-------------------------------------|-------------|-------------|-------------|---|-------------|-------------|-------------|
| H                                   | 2.45130600  | 1.88904300  | -3.68366800 | C | 5.58855500  | -0.92619700 | 1.05591400  |
| H                                   | 2.72330500  | 3.46313800  | -2.90618800 | C | 4.37434400  | -0.25006100 | 1.03283400  |
| H                                   | 1.30666000  | 2.49098800  | -2.47188600 | C | 2.14421600  | 1.81698000  | 0.90190800  |
| H                                   | 5.09841100  | 2.67446700  | -2.14925700 | C | 2.72911300  | 2.54068900  | -0.16343000 |
| H                                   | 4.78048100  | 1.14523000  | -2.98062800 | C | 3.06650400  | 3.87996900  | 0.07143700  |
| H                                   | 5.25538500  | 1.13942500  | -1.27445400 | C | 2.83749200  | 4.49666300  | 1.29825700  |
|                                     |             |             |             | C | 2.24704300  | 3.77914100  | 2.33663100  |
|                                     |             |             |             | C | 1.89462600  | 2.45021500  | 2.13096800  |
| T <sub>1</sub> optimization: unit Å |             |             |             | C | 1.89462600  | 2.45021500  | 2.13096800  |
| Ag                                  | -0.03246700 | -0.25501800 | -1.14826900 | C | -2.38359100 | -2.92053600 | -0.45619700 |
| Br                                  | 0.62151000  | -0.76303300 | -3.50386000 | C | -2.61656500 | -3.15422400 | -1.95537200 |
| P                                   | -1.66519400 | 0.07461500  | 0.69029800  | C | -2.20737400 | -4.24628000 | 0.29630800  |
| P                                   | 1.62099300  | 0.04600100  | 0.78866400  | C | -3.05424800 | 1.87562100  | -1.66252400 |
| C                                   | -3.29314900 | -0.77015800 | 0.65538600  | C | -2.29085600 | 2.45910100  | -2.85933000 |
| C                                   | -3.48962400 | -2.07697900 | 0.15260600  | C | -4.56998500 | 1.92900700  | -1.90152400 |
| C                                   | -4.77996200 | -2.61653500 | 0.21753700  | C | 1.95468800  | -3.12259000 | 0.12954700  |
| C                                   | -5.84904900 | -1.92303800 | 0.77860800  | C | 2.03180300  | -3.81203200 | -1.23903100 |
| C                                   | -5.64607600 | -0.64524800 | 1.29213900  | C | 1.69905800  | -4.13073900 | 1.25997700  |
| C                                   | -4.38048800 | -0.07269200 | 1.21840300  | C | 2.99339900  | 1.94746500  | -1.53855000 |
| C                                   | -2.08899300 | 1.87691700  | 0.73732700  | C | 2.18733700  | 2.68309400  | -2.61954600 |
| C                                   | -2.66751100 | 2.55872100  | -0.35803400 | C | 4.48717800  | 1.93895400  | -1.89268400 |
| C                                   | -2.90368900 | 3.93210200  | -0.21840100 | H | -4.95137600 | -3.61325800 | -0.18143200 |
| C                                   | -2.58324900 | 4.62181400  | 0.94809700  | H | -6.83382300 | -2.38191300 | 0.81472500  |
| C                                   | -2.00846500 | 3.94262800  | 2.01925700  | H | -6.46555100 | -0.09066200 | 1.74199800  |
| C                                   | -1.76012200 | 2.57821100  | 1.90660400  | H | -4.23056100 | 0.93136600  | 1.60349300  |
| C                                   | -0.79724200 | -0.40459900 | 2.16402500  | H | -3.35239900 | 4.47667400  | -1.04592000 |
| C                                   | -1.49338100 | -0.76755600 | 3.34224900  | H | -2.78124000 | 5.68869900  | 1.01647400  |
| C                                   | -0.83849100 | -1.15560600 | 4.49337200  | H | -1.75257200 | 4.46859100  | 2.93527400  |
| C                                   | 0.59102600  | -1.20874300 | 4.51162800  | H | -1.31159600 | 2.03529300  | 2.73442800  |
| C                                   | 1.30614500  | -0.87086800 | 3.38639900  | H | -2.58148500 | -0.75603800 | 3.32938900  |
| C                                   | 0.66553800  | -0.45570300 | 2.18229100  | H | -1.40898100 | -1.44329300 | 5.37178200  |
| C                                   | 3.17282600  | -0.91560500 | 0.71862700  | H | 1.11383300  | -1.53960700 | 5.40496900  |
| C                                   | 3.19703800  | -2.30046400 | 0.42470800  | H | 2.39267300  | -0.93382400 | 3.40546600  |
| C                                   | 4.43695800  | -2.94980600 | 0.44355700  | H | 4.47466600  | -4.01159000 | 0.21418800  |
| C                                   | 5.62045200  | -2.28422000 | 0.75011700  | H | 6.56184800  | -2.82775300 | 0.75513100  |

|   |             |             |             |   |             |             |             |
|---|-------------|-------------|-------------|---|-------------|-------------|-------------|
| H | 6.50020200  | -0.39294500 | 1.31223900  | H | -4.82699900 | 1.38699100  | -2.81909600 |
| H | 4.35370500  | 0.80756700  | 1.27377500  | H | -4.91851200 | 2.96240900  | -2.01723100 |
| H | 3.52070900  | 4.45561000  | -0.73149700 | H | -5.12191400 | 1.47518400  | -1.07237500 |
| H | 3.11509100  | 5.53840000  | 1.43926600  | H | 1.09305400  | -2.44146400 | 0.10499200  |
| H | 2.06089300  | 4.24876500  | 3.29895100  | H | 2.14963300  | -3.08319200 | -2.04708500 |
| H | 1.43099700  | 1.87937200  | 2.93110800  | H | 1.10942100  | -4.37343000 | -1.42788700 |
| H | -1.43999700 | -2.36749800 | -0.35069800 | H | 2.86431200  | -4.52394800 | -1.28646200 |
| H | -3.53779800 | -3.72363900 | -2.12826300 | H | 1.57691500  | -3.62348300 | 2.22240800  |
| H | -1.78359500 | -3.71823100 | -2.38913600 | H | 2.52822200  | -4.84288700 | 1.35028300  |
| H | -2.69376000 | -2.20792900 | -2.50071600 | H | 0.78792900  | -4.70463100 | 1.05922700  |
| H | -1.37994100 | -4.81867800 | -0.13804900 | H | 2.65550400  | 0.90352800  | -1.54149400 |
| H | -3.10620800 | -4.87048300 | 0.23083500  | H | 2.28687300  | 2.16870700  | -3.57950500 |
| H | -1.99033700 | -4.07515500 | 1.35591100  | H | 2.53510900  | 3.71635000  | -2.74031900 |
| H | -2.77761500 | 0.81521700  | -1.59171000 | H | 1.12237700  | 2.71431500  | -2.36759400 |
| H | -2.54217300 | 3.51427800  | -3.02056300 | H | 4.89421300  | 2.95633100  | -1.94265900 |
| H | -2.54172200 | 1.90976200  | -3.77348400 | H | 4.63383900  | 1.47297400  | -2.87368600 |
| H | -1.20783900 | 2.38713000  | -2.71802600 | H | 5.07273700  | 1.37390400  | -1.16066700 |
